# 1 **CIP2A interacts with TopBP1 and is selectively essential for DNA** 2 **damage-induced basal-like breast cancer tumorigenesis**

3

4 Anni Laine<sup>1,2\*</sup>, Srikar G. Nagelli<sup>1,3\*</sup>, Caroline Farrington<sup>4,5</sup>, Umar Butt<sup>1,3</sup>, Anna N. Cvrljevic<sup>1</sup>,  
5 Julia P. Vainonen<sup>1</sup>, Femke M. Feringa<sup>6#</sup>, Tove J. Grönroos<sup>7,8</sup>, Prson Gautam<sup>9</sup>, Sofia Khan<sup>1</sup>,  
6 Harri Sihto<sup>10</sup>, Xi Qiao<sup>1</sup>, Karolina Pavic<sup>1</sup>, Denise C. Connolly<sup>11</sup>, Pauliina Kronqvist<sup>3</sup>, Laura L.  
7 Elo<sup>1,3</sup>, Jochen Maurer<sup>12</sup>, Krister Wennerberg<sup>9</sup>, Rene H. Medema<sup>6</sup>, Heikki Joensuu<sup>10</sup>, Emilia  
8 Peuhu<sup>1,3</sup>, Karin de Visser<sup>2,13</sup>, Goutham Narla<sup>4,5</sup>, and Jukka Westermarck<sup>1,3</sup>

9

10 <sup>1</sup>Turku Bioscience Centre, University of Turku and Åbo Akademi University, Turku, Finland

11 <sup>2</sup>Division of Tumor Biology & Immunology, Oncode Institute, The Netherlands Cancer  
12 Institute, Amsterdam, The Netherlands

13 <sup>3</sup>Institute of Biomedicine, University of Turku, Turku, Finland

14 <sup>4</sup>Division of Genetic Medicine, Department of Internal Medicine, University of Michigan,  
15 Ann Arbor, MI, 48105, USA.

16 <sup>5</sup>Rogel Cancer Center, University of Michigan, Ann Arbor, MI, 48109, USA.

17 <sup>6</sup>Division of Cell Biology, Oncode Institute, The Netherlands Cancer Institute, Amsterdam,  
18 The Netherlands

19 <sup>7</sup>Turku PET Centre, University of Turku, Turku, Finland

20 <sup>8</sup>Department of Oncology and Radiotherapy, Turku University Hospital, Turku, Finland

21 <sup>9</sup>Institute for Molecular Medicine Finland (FIMM), HiLIFE, University of Helsinki, Helsinki,  
22 Finland

23 <sup>10</sup>Department of Pathology, University of Helsinki, Helsinki University Hospital, Helsinki,  
24 Finland

25 <sup>11</sup>Molecular Therapeutics Program, Fox Chase Cancer Center, Philadelphia, PA, USA

26 <sup>12</sup>Department of Obstetrics and Gynecology, University Hospital Aachen (UKA), 52074  
27 Aachen, Germany

28 <sup>13</sup>Department of Immunohematology and Blood Transfusion, Leiden University Medical  
29 Centre, Leiden, The Netherlands

30

31

32 \*These authors contributed equally

33

34

35 #Current address: Department of Molecular and Cellular Neurobiology, Faculty of Science,  
36 Center for Neurogenomics and Cognitive Research, Amsterdam Neuroscience, Vrije  
37 Universiteit Amsterdam, 1081HV, Amsterdam, The Netherlands

38

39

40

41

42

43 **Abstract**

44 Despite saturated genetic profiling of breast cancers, oncogenic drivers for the clinically  
45 challenging basal-like breast cancer (BLBC) subtype are still poorly understood. Here, we  
46 demonstrate that CIP2A is selectively essential for DNA damage-induced initiation of mouse  
47 BLBC tumors, but not of other cancer types. Mechanistically, CIP2A was discovered  
48 genome-widely the closest functional homologue for DNA-damage proteins TopBP1,  
49 RHNO, POLQ, NBN and PARP1. CIP2A directly interacts with the ATR-activation domain  
50 of TopBP1, and dampens both, chromatin binding of TopBP1 and RAD51, and G2/M  
51 checkpoint in DNA-damaged cells. CIP2A also drives BLBC-associated proliferative MYC  
52 and E2F1 signaling. Consistently with high DNA-damage response activity BLBCs, and  
53 CIP2A's novel role in checkpoint signaling, CIP2A was found essential for DNA-damaged,  
54 and BRCA-mutant BLBC cells. Selective role for CIP2A as BLBC driver was supported by  
55 association of high CIP2A expression with poor patient prognosis only in BLBC, but not in  
56 other breast cancer types. Therapeutically, small molecule reactivators of PP2A (SMAPs)  
57 phenocopy CIP2A-dependent DNA damage response, and inhibit *in vivo* growth of patient-  
58 derived BLBC xenograft. In summary, we discover sub-type selective essential role for  
59 CIP2A in BLBC initiation and maintenance that can be explained by its newly discovered  
60 association with DNA-damage response, coordinated with regulation of proliferative  
61 signaling. The results also identify therapeutic strategy for CIP2A-dependent BLBCs.

62

63

64

65

66

67

## 68 **Introduction**

69

70 Breast cancer is classified into molecular subtypes based on their cell surface receptor  
71 expression and transcriptional profiles. One of the most aggressive and clinically challenging  
72 breast cancer subtype is the basal-like breast cancer (BLBC)<sup>1-3</sup>. The hallmarks of BLBCs  
73 are high genetic instability, BRCA mutations, TP53 inactivation, constitutive DNA damage  
74 response (DDR) signaling, dysregulation of EGFR, and high proliferation activity<sup>1-3</sup>. About  
75 75% of BLBCs belong to the triple-negative breast cancer subtype (BL-TNBCs), devoid of  
76 ER, PR and HER2<sup>1</sup>. In addition to their frequently aggressive clinical appearance, the lack  
77 of these targetable receptors makes BLBCs therapeutically very challenging. Therefore,  
78 characterization of oncogenic driver(s) responsible for BLBC initiation and disease  
79 progression could provide novel opportunities for BLBC therapy.

80

81 Despite the near saturated genetic knowledge of breast cancer, no clear genetic oncogenic  
82 drivers have been identified for the BLBCs<sup>1,3</sup>. This indicates that BLBC is radically different  
83 from other breast cancer subtypes driven by either receptor tyrosine kinase activity in the  
84 case of HER2 positive breast cancers, or by hormonal receptor-mediated transcriptional  
85 programs such as in ER and PR positive breast cancers. The high proliferation activity in  
86 BLBCs can be accounted to loss of cell cycle inhibition by p53 mutations and to high EGFR  
87 activity, but there is no evidence that they alone, or in combination, would be sufficient for  
88 tumor initiation in BLBC. Beside high proliferation activity, genomic instability and high DDR  
89 activity are important hallmarks of BLBC<sup>2,3</sup>. Most clinical BLBCs are also deficient for  
90 homologous recombination (HR), either through the acquisition of BRCA mutations or other  
91 defects in the HR pathways. Based on these hallmarks of BLBC, it could be hypothesized

92 that potential drivers of this breast cancer subtype has to both support high proliferation  
93 activity, and also dampen the cell cycle effects of tumor suppressive DDR activity<sup>4, 5</sup>.

94

95 Healthy cells respond to double stranded DNA breaks (DSB) by activation of the G2/M cell  
96 cycle checkpoint and consequent mitotic arrest<sup>5</sup>. To allow mitotic progression under DNA  
97 damaging conditions, transformed cells instead have developed (phosphorylation-  
98 dependent) strategies to dampen G2/M checkpoint signaling<sup>5, 6</sup>. These mechanisms are  
99 important in the early phases of tumor initiation by allowing the mitotic progression of DNA  
100 damaged premalignant cells. One of the DDR proteins involved in G2/M checkpoint  
101 signaling is DNA Topoisomerase II binding protein 1 (TopBP1)<sup>7, 8</sup>, which is a scaffold protein  
102 interacting with checkpoint kinase ATR through its ATR-activation domain (AAD)<sup>9</sup>. In the  
103 presence of DSBs, TopBP1 promotes RAD51 chromatin loading resulting in G2/M arrest<sup>10-  
104 14</sup>. These features make TopBP1 an interesting effector for G2/M checkpoint dampening in  
105 cancer cells<sup>5, 8, 12</sup>, but to date its regulation and importance in BLBC cells has remained  
106 largely unknown.

107

108 While kinase dysregulation appears to be insufficient to drive BLBC initiation, the role of their  
109 counterparts, phosphatases remain to be poorly understood. Recently serine/threonine  
110 phosphatase PP2A have gained attention as a druggable tumor suppressor<sup>15-17</sup>. Especially  
111 the role of serine/threonine phosphatases in DNA damage response at chromatin<sup>6</sup>, could  
112 link them to cancer types with high mutation burden such as BLBCs. PP2A is inhibited in  
113 most cancers by non-genetic mechanisms including high expression of endogenous  
114 inhibitor proteins such as CIP2A, PME-1 or SET<sup>17, 18</sup>. *CIP2A* gene is not genetically  
115 prevalently mutated in any cancer type (<https://cancer.sanger.ac.uk/cosmic>), and it is only  
116 expressed at low levels in normal mammary gland tissue. However, *CIP2A* transcription is

117 induced by *TP53* mutation via E2F1 activity<sup>19, 20</sup>, and by EGFR<sup>21, 22</sup>, all features closely  
118 linked to BLBC. However, it is currently unclear what is CIP2A's potential role in BLBC  
119 initiation, maintenance, or therapeutic targeting. In general, it is unclear whether CIP2A, or  
120 any of the PP2A inhibitor proteins, are essential for initiation of any cancer type? Notably,  
121 understanding of CIP2A-related cancer initiation mechanisms is also therapeutically  
122 relevant due to recent development of small molecule activators of the CIP2A-inhibited  
123 PP2A-B56 with potent antitumor activities in several preclinical cancer models *in vivo*<sup>15, 16</sup>.

124

125 In this study, we provide first evidence for essential role for PP2A inhibitor protein in tumor  
126 initiation. Specifically, we demonstrate that CIP2A is selectively essential for initiation of  
127 BLBC, but not of other mouse tumor types. Further, among transformed breast cancer cell  
128 types, CIP2A is selectively essential for survival of BRCA/TP53-mutant BLBC cells.  
129 Mechanistically this can be explained by previously unidentified profound functional  
130 similarity between CIP2A and the core DDR proteins; and subsequent role for CIP2A in  
131 preventing RAD51 recruitment to chromatin upon DNA-damage. CIP2A also promotes MYC  
132 and E2F1 activities in BLBC cells; Finally, we discover that SMAPs transcriptionally inhibit  
133 *CIP2A* expression and serve as candidate therapeutics for CIP2A-positive BLBCs.

134

135 **Results**

136 ***Cip2a* is selectively required for initiation of DMBA-induced mammary tumors in mice**

137 Thus far the only evidence for the importance of CIP2A for *in vivo* tumor initiation is modest  
138 reduction of number of HER2-driven mammary tumors in the genetic crosses between  
139 transgenic MMTV-neu and *Cip2a*-deficient (*Cip2a*<sup>-/-</sup>) mouse models<sup>20</sup>. Thus, it is yet totally  
140 unclear whether CIP2A is essential for initiation of any cancer (sub)type *in vivo*. To address  
141 this question, we challenged the previously described *Cip2a*<sup>-/-</sup> mice<sup>20, 23</sup> with a chemical  
142 carcinogenesis protocol consisting only of six consecutive doses of the genotoxic agent  
143 7,12-dimethylbenz[a]anthracene (DMBA)(Fig. 1A). Similar to other polyaromatic  
144 hydrocarbons, DMBA forms covalent DNA adducts, and induces a DNA damage response  
145 (DDR) including activation of  $\gamma$ H2AX, ATR, and RAD51<sup>24, 25</sup>. Oral exposure of mice with  
146 DMBA induces mouse BLBCs<sup>26</sup>, but also several other cancers<sup>27</sup>, allowing us to assess  
147 the relative importance of *Cip2a* across different mouse cancer types. Importantly, as  
148 compared to models combining DMBA and hormones, such as progestin  
149 Medroxyprogesterone Acetate (MPA), the DMBA-only mammary tumors are initiated with  
150 much longer latency<sup>28</sup>, better resembling course of human breast cancer development.  
151 Molecularly DMBA-induced BLBCs are also different from *Brca*/*p53* mutant, or transgenic  
152 Wnt-induced tumors. For example, whereas deletion of either *Brca1* or *Brca2* abrogates  
153 Rad51 recruitment upon DNA-damage<sup>29</sup>, basal cells from DMBA model have retained this  
154 DDR mechanism relevant to cell cycle arrest in S-phase<sup>10-12, 26</sup>. Thereby use of DMBA-  
155 induced model, in which the tumor initiating cell population is basal cells<sup>28</sup>, could allow  
156 discovery of BLBC driver mechanisms not necessarily revealed by the other models.

157

158

159

160 As expected <sup>25</sup>, DMBA treatment induced a significant increase in mutation load in non-  
161 tumorigenic mammary gland tissue already 2 weeks after the last DMBA dosing; however  
162 the mutation load (Fig. 1B), or overall survival was not associated with *Cip2a* genotype (Fig.  
163 1C). When assessed by palpation, external observation, and by tissue pathology analysis  
164 upon autopsy of the mice with any symptoms of reduced well-being, tumors in five different  
165 tissue types were observed in the DMBA-treated mice (Fig. 1D). In addition, mice displayed  
166 other pathological phenotypes mostly associated with lymphadenopathy. Notably, while  
167 incidence of tumors in ovary, lung, skin or stomach were not altered in *Cip2a*<sup>-/-</sup> mice,  
168 mammary tumors showed almost absolute dependence on *Cip2a* for tumor initiation (Fig.  
169 1D-F). To control that lack of genotype dependence of other cancer types on *Cip2a* was not  
170 due to leakage of genetrap cassette used for *Cip2a* gene silencing <sup>23</sup>, we confirmed the  
171 absence of CIP2A protein expression in ovarian cancer tissues from *Cip2a*<sup>-/-</sup> mice (Fig.  
172 S1A). We further confirmed that *Cip2a* was dispensable for skin and ovarian tumorigenesis  
173 by independent *in vivo* models. To this end, we crossed *Cip2a*<sup>-/-</sup> mice with the MISIIR-Tag  
174 mouse model producing tumors resembling high grade ovarian cancer <sup>30</sup>, but did not  
175 observe any notable difference in ovarian tumorigenesis between *Cip2a* wild-type (*WT*) or  
176 *Cip2a*<sup>-/-</sup> mice by PET/CT-imaging or by visual inspection after autopsy (Fig. 1G, S1B). For  
177 the skin tumorigenesis we used classical DMBA/TPA two-stage skin tumorigenesis protocol  
178 as described in the supplementary materials and methods. Nevertheless, there was no  
179 difference in skin tumor initiation between *Cip2a* genotypes (Fig. S1C).

180

181 Results above strongly indicate that CIP2A is required for propagation of DNA-damaged  
182 mammary epithelial cells. To validate that this is a cell intrinsic property of CIP2A, we tested  
183 the impact of CIP2A silencing on mitotic progression of MCF-10A basal like immortalized

184 mammary epithelial cells treated with ionizing radiation (IR). Notably, whereas inhibition of  
185 checkpoint kinase CHK1 abrogated G2/M checkpoint, and CIP2A silencing did not impact  
186 mitotic progression of untreated MCF-10A cells (Fig. S1D), CIP2A was found indispensable  
187 for G2/M progression in IR-treated MCF10A cells (Fig. 1H). To provide independent  
188 validation to these results, and to assess the selectivity of CIP2A among other PP2A inhibitor  
189 proteins, we surveyed results from a genetic screen in HAP1 cells <sup>31</sup>(see Fig. S1E for  
190 technical description). Directly supportive of the results in MCF-10A cells, CIP2A was the  
191 only tested PP2A inhibitor protein that became significantly essential under repeated low-  
192 dose irradiation (Fig. S1F).

193

194 These results establish notable selective essentiality for *Cip2a* for mitotic progression of  
195 DNA-damaged cells, and for the initiation of DNA-damage induced mammary tumors  
196 previously defined to represent mouse BLBCs<sup>26</sup>. As such the results represent first evidence  
197 for potential cancer driver role for CIP2A in any cancer type.



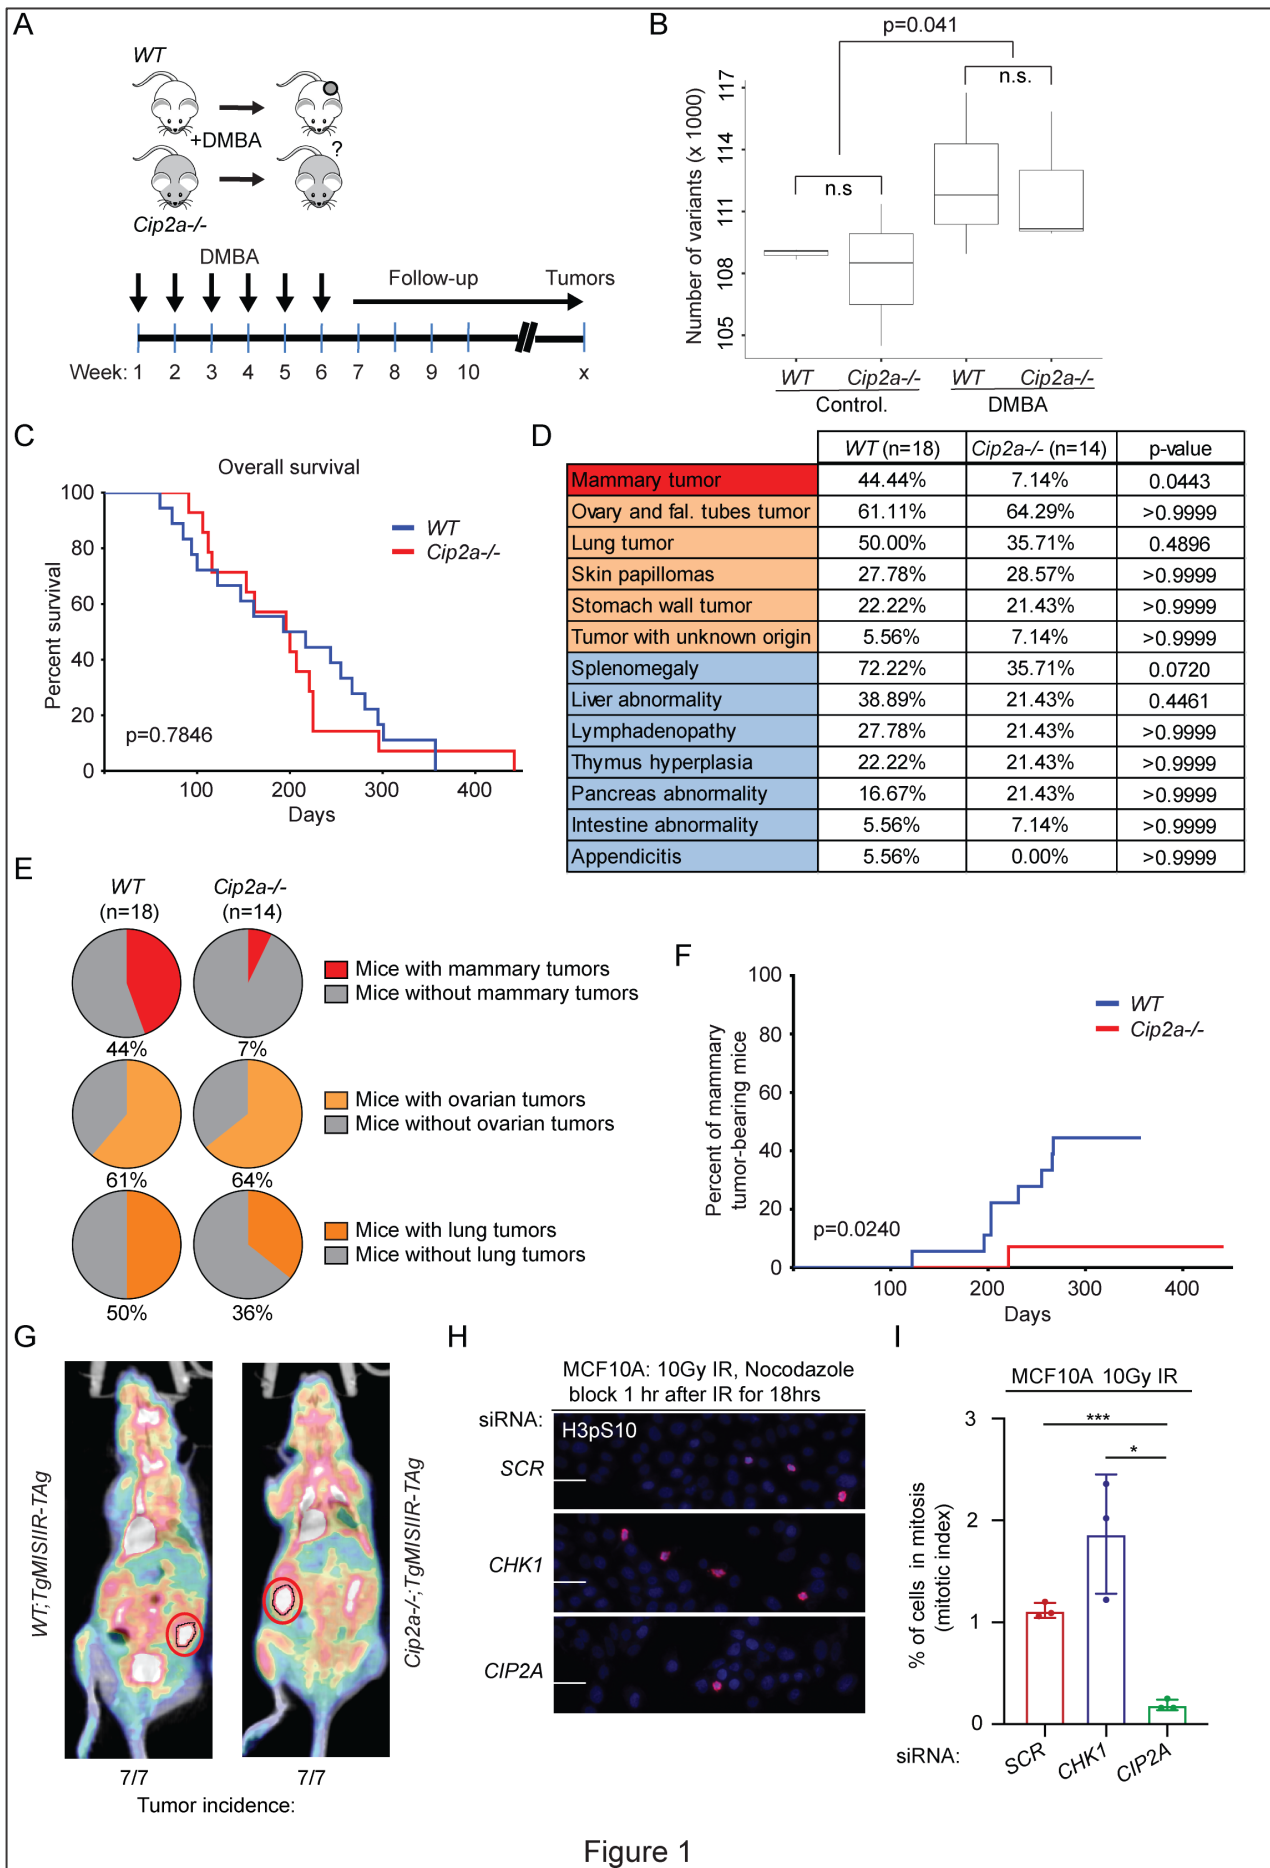

Figure 1

199 **Figure 1. *Cip2a* knockout mice are selectively resistant to DMBA-induced mammary**  
200 **tumorigenesis. A**, A schematic presentation of the chemical *in vivo* carcinogenesis mouse model. DMBA  
201 was orally administered to wild type (*WT*) and *Cip2a*<sup>-/-</sup> mice once a week for 6 consecutive weeks after  
202 which mice were monitored for signs of spontaneous tumor formation. **B**, Number of genetic variants in  
203 exons of the expressed genes in non-treated (control) and DMBA-treated *WT* (n=3) and *Cip2a*<sup>-/-</sup> (n=3)  
204 mouse mammary glands. P-value by Wilcoxon test. **C**, Overall survival of *WT* and *Cip2a*<sup>-/-</sup> mice in days  
205 after starting of DMBA administration. Shown is the survival of 18 *WT* and 14 *Cip2a*<sup>-/-</sup> mice. P-value by  
206 log-rank test. **D**, Incidences of tumor formation in different tissues and other pathologies in sacrificed  
207 DMBA-administered *WT* (n=18) and *Cip2a*<sup>-/-</sup> (n=14) mice. P-values between *WT* and *Cip2a*<sup>-/-</sup> groups in  
208 each pathology calculated by Fisher's exact test. **E**, Proportion of the most common tumor types induced  
209 by DMBA in *WT* and *Cip2a*<sup>-/-</sup> mice. Percentage of tumor carrying mice in both groups shown under pie  
210 charts. **F**, Incidence of mammary tumors in *WT* (n=18) and *Cip2a*<sup>-/-</sup> (n=14) mice presented in days after  
211 starting administration of DMBA. P-value by log-rank test. **G**, Incidence of ovarian tumors in  
212 *WT;TgMISIIRTag* and *Cip2a*<sup>-/-</sup>;*TgMISIIR-Tag* mice. Mice imaged by metabolic active tumor volume  
213 (MATV) definition by <sup>18</sup>F-FDG PET/CT imaging. Red circle denotes the tumor. **H**, Mitotic index analysis of  
214 MCF10A cells transfected with the indicated siRNAs. *CHK1* siRNA was used as positive control. Cells were  
215 treated with 10Gy radiation dose and Nocodazole (100 ng/ml) block 1 hour after IR for 18 hours. Mitotic cells  
216 were stained using phospho-histone H3 at Ser10. Scale bar: 100µm. **I**, % of H3pS10 positive nuclei in pooled  
217 form from n=3 replicates, expressed as mean ± SD.

218

219 ***Cip2a* is induced by DMBA in premalignant mammary gland tissue and drives**  
220 **initiation of mouse BLBC-like tumors**

221 A key criterion for a cancer driver candidate involved in tumor initiation, is expression in  
222 premalignant tissue prior tumorigenesis. To examine this, we studied *Cip2a* mRNA  
223 expression in non-tumorigenic mammary gland tissues from control and DMBA-treated  
224 animals, and from DMBA-induced mammary tumors in *Cip2a* *WT* mice. Consistent with  
225 negligible CIP2A protein expression in normal human mammary glands <sup>28</sup>, *Cip2a* mRNA  
226 was expressed at a very low level in control mouse mammary glands (Fig. 2A). Importantly,  
227 mammary glands sampled 2 weeks after the 6th dose of DMBA (Fig. 1A) displayed  
228 significantly increased *Cip2a* mRNA expression (Fig. 2A). In line with suggested role as a

229 disease driver, *Cip2a* mRNA expression was induced significantly further in mammary  
230 tumors from DMBA-treated *WT* mice (Fig. 2A).

231 Next, we conducted molecular characterization of the mammary tumors from DMBA-treated  
232 *WT* mice. Consistent with a previous report demonstrating that the tumor initiating cells from  
233 the DMBA model are of basaloid origin<sup>26</sup>, we observed a BLBC and BL-TNBC phenotypes  
234 in majority of the characterized tumors (Fig. 2B-D). Also consistent with BLBC phenotype,  
235 the tumors in *WT* mice were highly proliferative based on Ki67 staining, and displayed MYC  
236 protein overexpression (Fig. 2B). Notably, the lack of predominantly BLBC tumors in *Cip2a*-  
237 *-/-* mice was not related to any genotype-associated alterations in the basal and luminal  
238 epithelial cell ratio in the mammary gland (Fig. 2E,F). The purity of basal and luminal  
239 fractions was assessed by qRT-PCR (Fig. S2A,B). Furthermore, consistent with the very  
240 low expression of *Cip2a* in normal mammary glands (Fig. 2A), and the normal nursing  
241 behavior of the *Cip2a*-*-/-* mice, we did not observe any notable differences in the mammary  
242 gland development and branching morphogenesis between *WT* and *Cip2a*-*-/-* mice (Fig. 2G).  
243 Collectively, these results demonstrate that although *Cip2a* is dispensable for normal mouse  
244 mammary development, DNA-damage-elicited induction of *Cip2a* mRNA expression is  
245 required for initiation of mouse BLBC-like tumors.

246

247

248

249

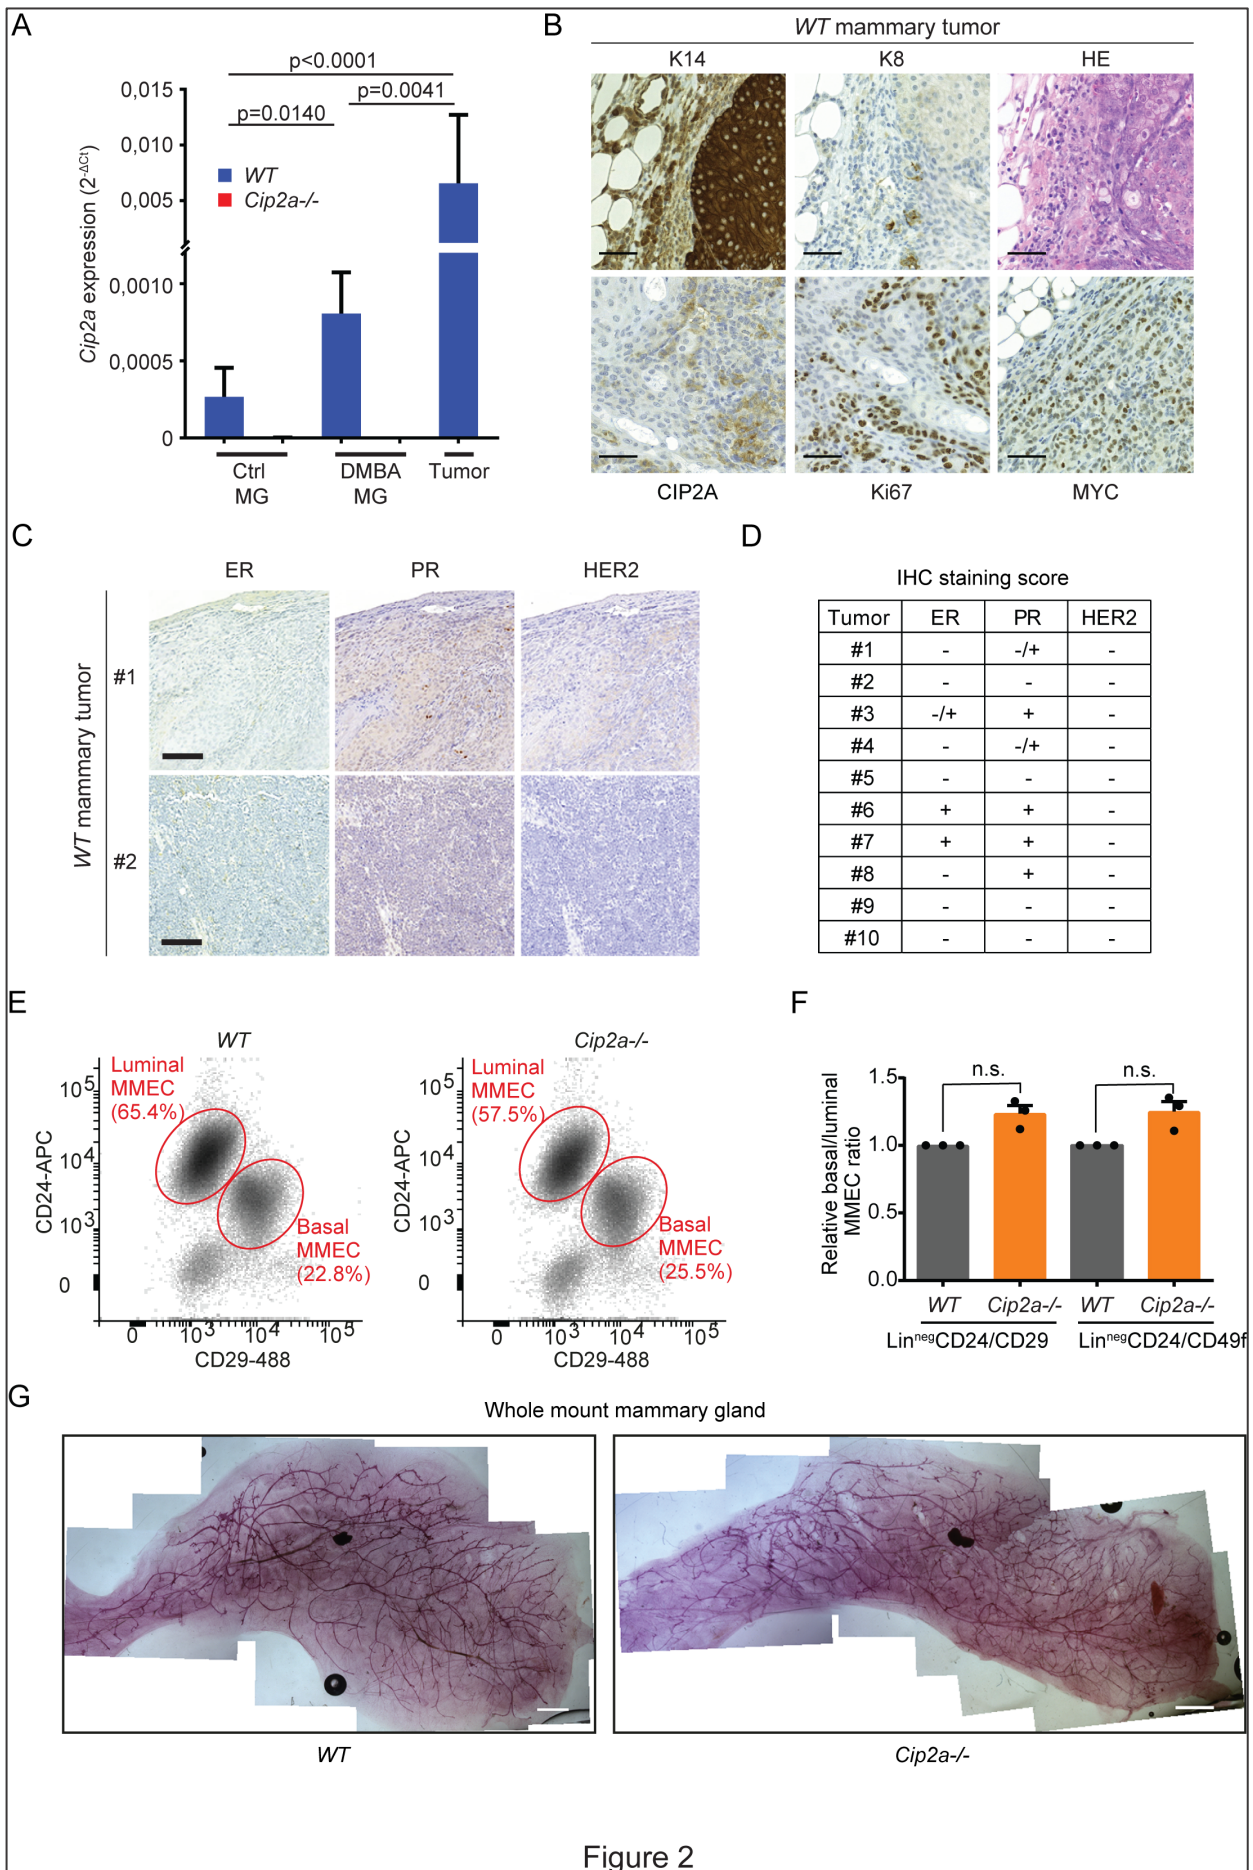

Figure 2

251 **Figure 2: *Cip2a* drives initiation of mouse BLBC-like tumors but is dispensable for normal**  
252 **mammary gland development** **A**, qRT-PCR analysis of *Cip2a* mRNA expression normalized to *Actb* and  
253 *Gapdh* from *WT* and *Cip2a*<sup>-/-</sup> non-treated (Ctrl) and DMBA-administered mouse non-tumorigenic mammary  
254 glands (MG), and *WT* DMBA-induced mammary tumors. Shown is mean ± SD of 10 *WT* and 9 *Cip2a*<sup>-/-</sup> non-  
255 treated mammary glands (Ctrl MG), 3 *WT*, and 3 *Cip2a*<sup>-/-</sup> mammary glands from DMBA-administered mice,  
256 and 16 mammary tumors from *WT* DMBA-induced mice. P-values calculated by Mann-Whitney test. **B**,  
257 Immunohistochemical characterization of DMBA-induced mammary tumors from *WT* mice. Shown are  
258 representative images of immunohistochemical staining of Keratin-14 (K14), Keratin-8 (K8), CIP2A, Ki67 and  
259 MYC proteins and hematoxylin and eosin (HE) histochemical staining. Scale bar: 50µM **C**,  
260 Immunohistochemical characterization of DMBA-induced mammary tumors from *WT* mice for receptor status.  
261 Shown are representative images of immunohistochemical staining of estrogen receptor (ER), progesterone  
262 receptor (PR) and HER2 from two individual tumors. Scale bar: 100µM **D**, Semiquantitative analysis of receptor  
263 status from 10 individual *WT* tumors. **E**, Mouse mammary epithelial cells (MMECs) isolated from *WT* and  
264 *Cip2a*<sup>-/-</sup> mice were immunolabelled for surface markers. Among the lineage-negative cells (CD31<sup>neg</sup>,  
265 CD45<sup>neg</sup>), the basal epithelial (CD24<sup>low-neg</sup>, CD29<sup>high</sup>) and luminal epithelial (CD24<sup>pos</sup>, CD29<sup>low-neg</sup>) cell  
266 populations were quantified by flow cytometry. The gates and % of cells are indicated in red. **F**, The ratio  
267 between basal and luminal epithelial cells in each sample calculated using two different labelling strategies  
268 (CD24/CD29 and CD24/CD49f) and pooled from independent experiments (n=3). Data are mean ± SEM. P-  
269 values calculated by unpaired t-test. **G**, Representative images of mammary gland whole mounts from adult  
270 *WT* and *Cip2a*<sup>-/-</sup> mice. Scale bar: 2 mm.

271

272 **Co-dependence analysis reveals a functional association between CIP2A, TopBP1**  
273 **and homology directed DNA repair**

274

275 CIP2A promotes several different oncogenic mechanisms across human cancer types<sup>20, 32,</sup>  
276 <sup>33</sup>. However, as the currently known mechanisms regulated by CIP2A do not explain the  
277 selective essentiality of CIP2A for DNA-damage-induced BLBC initiation (Fig. 1), we  
278 hypothesized that CIP2A promotes BLBC initiation by yet uncharacterized DNA-damage  
279 associated mechanism. To identify such mechanism, we surveyed a CRISPR/Cas9-based  
280 dropout screen repository from DepMap (Avana 2020 Q1; <https://depmap.org>), to identify  
281 genes in an unbiased manner that are most significantly similar in their essentiality with  
282 *CIP2A* across all 739 human cancer cell lines. Consistent with the observed *Cip2a*-

283 dependency of DNA-damage-induced tumorigenesis (Fig. 1), the top 10 co-dependent  
284 genes with *CIP2A* (i.e. functionally most similar to *CIP2A*) were all associated with DNA  
285 repair (Fig. 3A). Notably, out of the top ten *CIP2A*-associated DNA repair factors, *CIP2A*  
286 was at the genome-wide level the most significantly similar gene for *RHNO1*, *TOPBP1*,  
287 *POLQ*, *NBN* and *PARP1* (Fig. 3A,B). In the case of *TOPBP1*, the co-dependency with *CIP2A*  
288 was greater than with *ATR* (Fig. 3B), which is the bona-fide TopBP1 DDR effector<sup>8, 9</sup>.  
289 Although surprising, these results are supported by recent screening results implicating  
290 essentiality of both *CIP2A* and TopBP1 for recovery of cancer cells from *ATR* inhibition<sup>34</sup>.  
291 When analyzed for functional protein association networks by STRING database  
292 (<https://string-db.org>), the *CIP2A*-associated proteins (Fig. 3A) formed a tight protein  
293 network (Fig. 3C) that was functionally linked with processes such as “Homology directed  
294 Repair”, “G2/M DNA damage checkpoint”, and “Processing of DNA double-strand break  
295 ends” (Fig. 3D). Interestingly, in a recent PP2A-related phosphoproteome survey<sup>35</sup>, *CIP2A*  
296 was found to prevent the dephosphorylation of Nibrin (*NBN*) which was one of the TopBP1  
297 protein network members and is known to co-operate with TopBP1 in *ATR* activation<sup>36</sup>(Fig.  
298 3C). Additional evidence for the intertwining of *CIP2A* with the TopBP1 complex, and  
299 mitosis, was obtained by mRNA co-expression analysis across 1156 cell lines from the  
300 Broad institute Cancer Cell line Encyclopedia<sup>37</sup>(Fig. S3A). Reactome pathway analysis of  
301 the 10 genes most significantly co-expressed with *CIP2A* revealed clear enrichment of  
302 mitotic genes (Fig. 3E). Of the *CIP2A* co-dependent genes (Fig. 3A), *TOPBP1* and *POLQ*  
303 were also among the 25 most significantly co-expressed genes with *CIP2A* (Fig. 3F and Fig.  
304 S3A). Both these genes showed also very significant co-expression with *CIP2A* in BLBC  
305 (Fig. S3B). Collectively these results reveal an intimate, but previously unidentified  
306 association of *CIP2A* with critical DNA repair complex proteins, and with homology directed

307 DNA repair in mitosis; potentially highly relevant to the role of CIP2A in facilitating malignant  
 308 progression towards BLBC under DNA damaging conditions *in vivo* (Fig. 1).

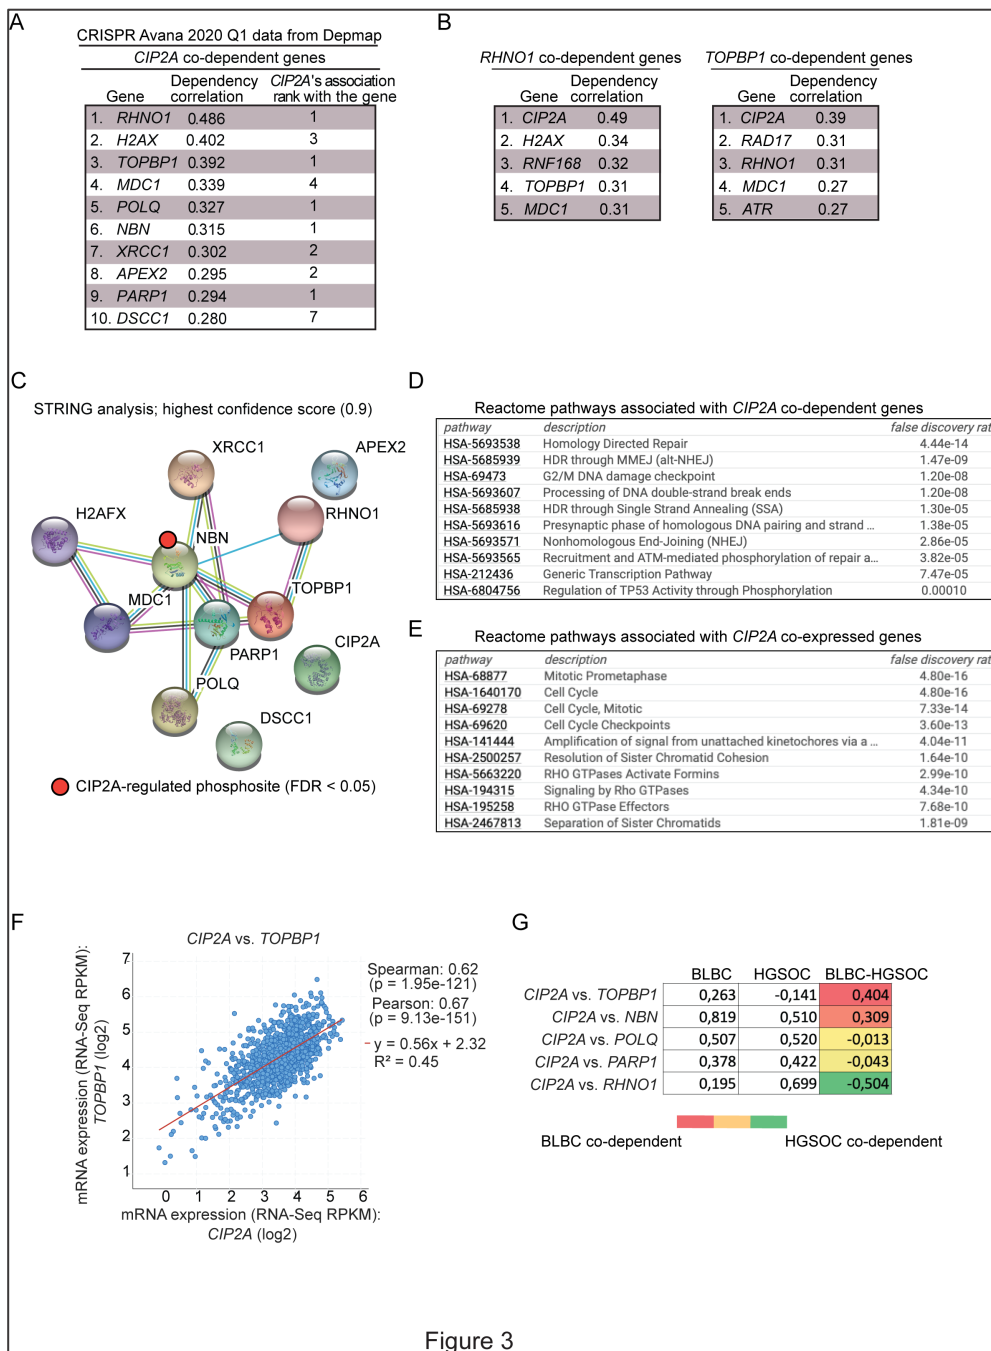

309  
 310  
 311 **Figure 3: Co-dependence analysis reveals functional association of CIP2A with critical DNA**  
 312 **damage response proteins** **A**, Top 10 co-dependencies of *CIP2A* across 739 cell lines genome-wide  
 313 from CRISPR Avana screen. *CIP2A*'s own co-dependency rank for the top 10 genes is also listed. Data  
 314 extracted from DepMap portal (Avana 2020Q1). **B**, Genome-widely, *CIP2A* is the closest functional  
 315 homologue to *RHNO1* and *TOPBP1*. **C**, STRING functional protein association network analysis of *CIP2A*  
 316 co-dependent proteins from (A). By using the highest data confidence score (0.9), except for *APEX2*,  
 317 *DSCC1* and *CIP2A*, the other proteins form highly connected protein network. *NBN* phosphorylation

318 indicated by red dot was found to be regulated by CIP2A based on <sup>35</sup>. **D**, Top 10 Reactome pathways  
319 associated with genes from (A). **E**, Top 10 Reactome pathways associated with CIP2A co-expressed  
320 genes derived from Cancer Cell Line Encyclopedia (1156 samples). **F**, Correlation between *CIP2A* and  
321 *TOPBP1* mRNA expression across 1156 cell lines from Cancer Cell Line Encyclopedia. **G**, Pair-wise  
322 correlation of dependence of either BLBC or HGSOC cell lines of the indicated genes from DepMap portal  
323 (Avana 2020Q1). The values for BLBC and HGSOC indicates correlation (max. 1) in dependence of the  
324 cells for the genes in the gene pair; the higher number indicating for higher similarity in the dependence.  
325 The color-coded numbers indicate the difference in the co-dependence between BLBC and HGSOC cells  
326 for the indicated gene pair.

327

328

329 The DepMap co-dependence data was also utilized to understand the interesting difference  
330 in CIP2A dependence in the initiation of mammary and ovarian cancers, as BLBC and high  
331 grade serous ovarian cancer (HGSOC) are known to share similar characteristics. To this  
332 end, we analyzed in a pair-wise fashion the correlation between dependence on either  
333 *CIP2A*, or one of the genes *RHNO1*, *TOPBP1*, *POLQ*, *NBN* and *PARP1* across either BLBC  
334 or HGSOC cell lines. In BLBC, *TOPBP1* and *NBN* had higher co-dependence with CIP2A  
335 than in HGSOC cells, while in HGSOC, *RHNO1* was more co-dependent with *CIP2A* (Fig.  
336 3G). These differences may provide one plausible explanation for the differential  
337 requirement of *Cip2a* for DMBA-induced BLBC-like, but not ovarian cancer initiation (Fig.  
338 1D,E,G). Notably, *TOPBP1* was the only studied gene which did not show *CIP2A* co-  
339 dependence in HGSOC cells, but was co-dependent in BLBC cells (Fig. 3G), strengthening  
340 the role of TopBP1 as the candidate mechanistic link between CIP2A, and malignant  
341 progression of DNA-damaged BLBC cells.

342

### 343 **CIP2A dampens TopBP1-RAD51 function under DNA damage**

344

345 The results above identify CIP2A as a novel candidate protein involved in the function of  
346 TopBP1 in double stranded DNA damage repair, and in G2/M arrest. However, as illustrated



347 by the STRING analysis (Fig. 3C), there is currently no evidence for direct mechanistic link  
348 between CIP2A and the TopBP1 complex. Here, by using a genome-wide Y2H assay with  
349 human breast cancer cDNA library, TopBP1 was identified with very high confidence as a  
350 direct interaction partner for CIP2A (Table S1 and Fig. 4A). Interaction between TopBP1  
351 and endogenous nuclear CIP2A<sup>38</sup> was confirmed by co-immunoprecipitation analysis (Fig.  
352 4B), and by proximity ligation analysis (Fig. S4A). The interaction with CIP2A was delineated  
353 to be mediated by the 6<sup>th</sup> BRCT domain of TopBP1, both by matching the interacting regions  
354 from overlapping TopBP1 fragments in the Y2H assay (Fig. 4A, Table S1), and by co-  
355 immunoprecipitation analysis (Fig. 4C,D). Notably, the interaction was greatly strengthened  
356 by the presence of the ATR-activation domain (AAD) of TopBP1 adjacent to 6<sup>th</sup> BRCT repeat  
357 (Fig. 4C,D). Functionally, removal of CIP2A resulted in constitutive ATR activation in the  
358 basal-type premalignant mammary cell line MCF-10A (Fig. 4E). As a more direct evidence  
359 linking CIP2A to TopBP1-regulated DDR, the highest H2AX phosphorylation ( $\gamma$ H2AX) was  
360 observed in CIP2A-depleted cells overexpressing TopBP1 variant that contains AAD (Fig.  
361 4F).  $\gamma$ H2AX also co-immunoprecipitated with TopBP1 and CIP2A from DNase treated  
362 cellular lysates (Fig. 4B). As further support for the role of CIP2A in dampening TopBP1  
363 function, CIP2A depletion resulted in enhanced chromatin recruitment of TopBP1 in X ray-  
364 irradiated (IR) MCF10A cells (Fig. 4G,H). This was specific to TopBP1, as CIP2A did not  
365 impact IR-induced p53BP1 chromatin recruitment (Fig. S4B). Furthermore, consistently with  
366 the role of both TopBP1<sup>12-14</sup>, and POLQ<sup>39</sup> in controlling RAD51 loading to chromatin, and  
367 the role of RAD51 in DSB repair<sup>12, 13</sup>, the *Cip2a*<sup>-/-</sup> mammary epithelial cells exposed to IR  
368 displayed enhanced RAD51 chromatin recruitment (Fig. 4I,J). The enhanced chromatin  
369 recruitment of both TopBP1 and RAD51 in CIP2A-deficient cells provides as mechanistic  
370 explanation for the observed G2/M cell cycle arrest<sup>8, 10, 11, 40, 41</sup> (Fig. 1G). Finally, it has  
371 been reported that TopBP1 determines cancer cell sensitivity to PARP inhibition by

372 regulating RAD51 chromatin loading <sup>13</sup>. Also consistent with this observation, *CIP2A*  
373 depletion hypersensitized BRCA-proficient MDA-MB-231 cells to two different PARP  
374 inhibitors (Fig. S4C).

375

376 Collectively, the newly discovered role for CIP2A in blunting TopBP1 and RAD51 chromatin  
377 recruitment provides a mechanism for dampening of the DDR <sup>5</sup>, and G2/M checkpoint, in  
378 DNA-damaged cells (Fig. 4K). DDR dampening also provides a plausible mechanistic  
379 explanation for the requirement of CIP2A for continuous proliferation of DNA-damaged  
380 mammary epithelial cells; and thereby for BLBC initiation.

381

382

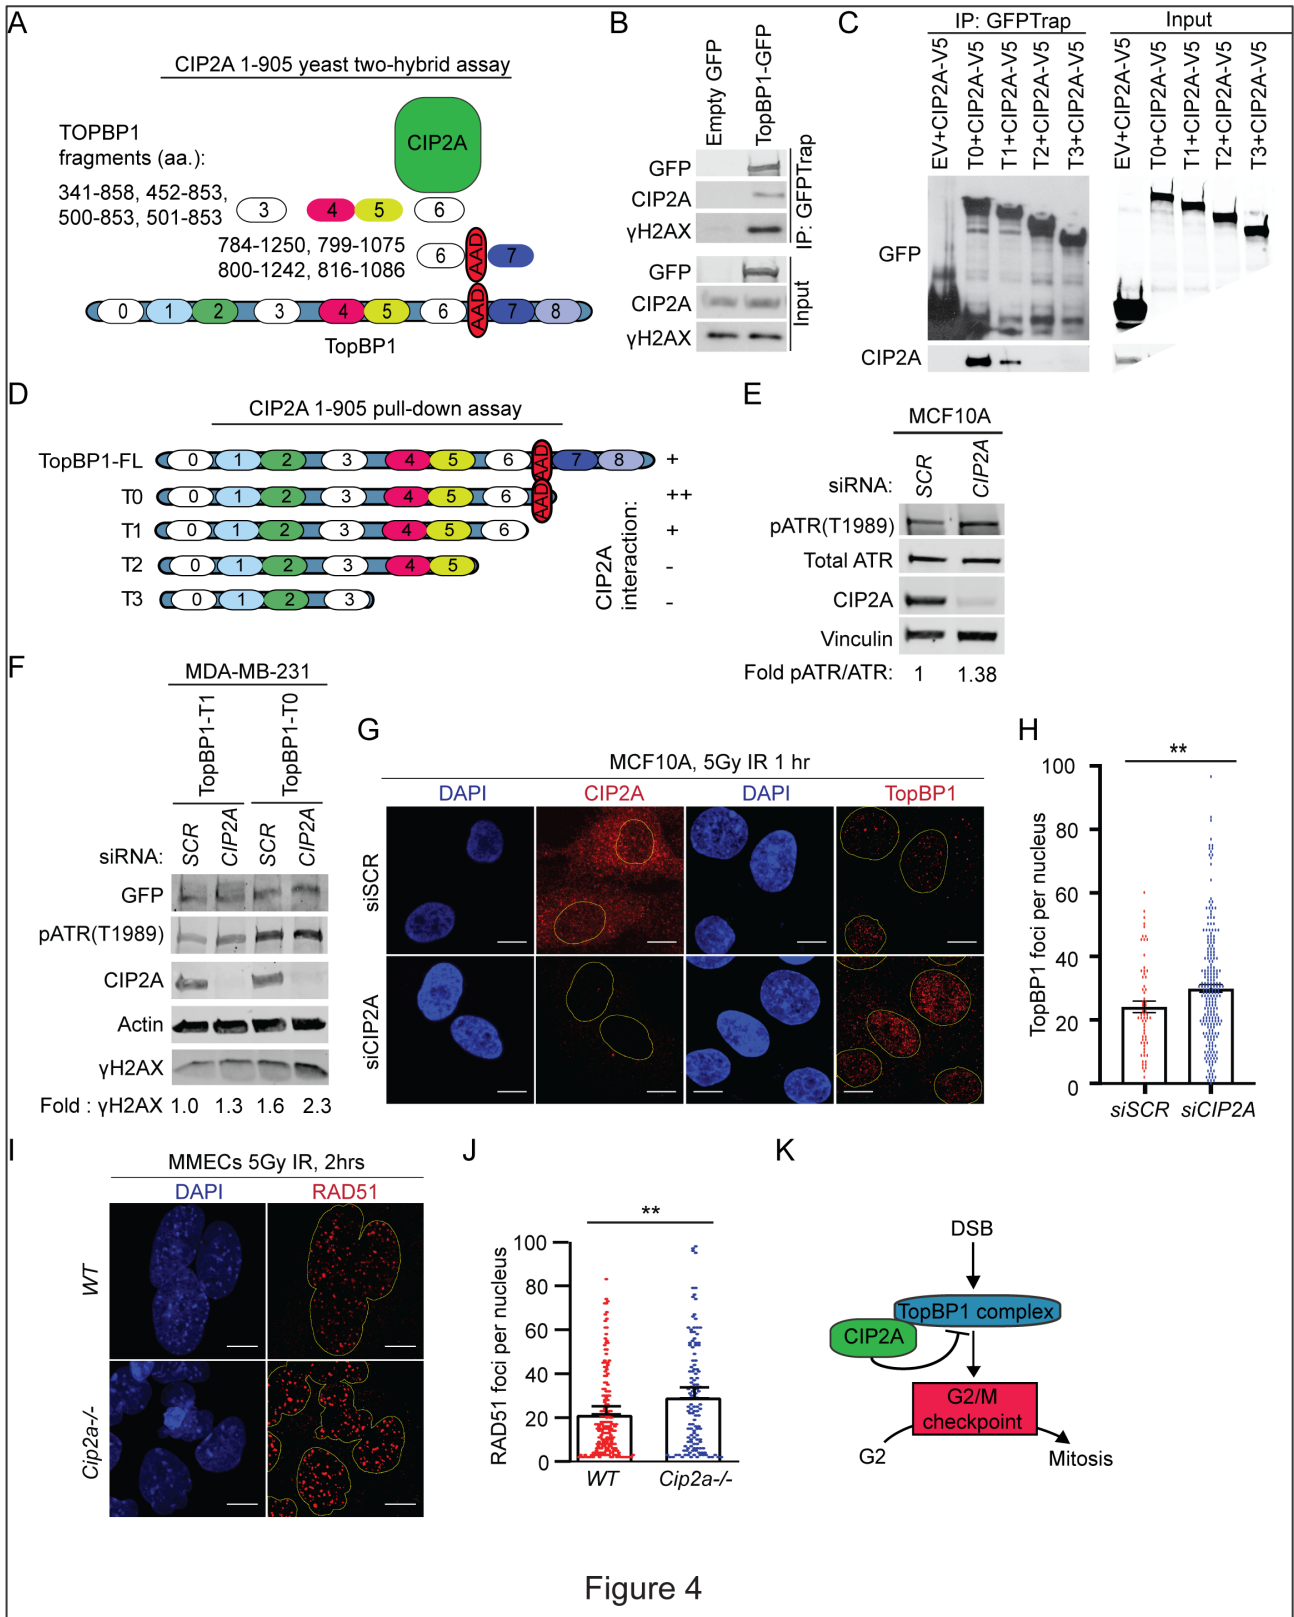

383

384

385

386

387 **Figure 4: CIP2A is an interacting partner of TopBP1 and promotes mitotic progression of DNA**  
388 **damaged cells. A**, Schematic presentation of breast cancer cell line cDNA fragments coding for TopBP1  
389 domains that interact with full length CIP2A in a yeast two-hybrid assay. Numbers in the TopBP1 drawing refer  
390 to BRCT domains 1-8; AAD, ATR activation domain. **B**, Co-immunoprecipitation between endogenous CIP2A  
391 and  $\gamma$ H2AX in HEK293 cells transiently overexpressing GFP or full length TopBP1-GFP as indicated. Input 5%  
392 of total IP. **C**, Co-immunoprecipitation of CIP2A in HEK293 cells transiently overexpressing V5-tagged CIP2A  
393 and GFP-tagged Empty vector (EV) or TopBP1 truncated mutants T0, T1, T2, T3 as indicated in (D). Input 5%  
394 of total IP. **D**, Schematic representation of TopBP1 mutants used in (B,C) Relative interaction efficiencies are  
395 estimated from the experiment where all indicated mutants were included. **E**, Basal-like immortalized  
396 MCF10A cells transfected with non-targeting (*SCR*) or *CIP2A* siRNAs for 48hrs. Immunoblot of whole cell  
397 extracts (WCEs) probed for pATR, total ATR and CIP2A. Vinculin was used as a loading control. Quantification  
398 represent mean of three experiments. **F**, MDA-MB-231 cells transfected with non-targeting (*SCR*) and *CIP2A*  
399 targeting siRNAs for 72 hrs and overexpressing TopBP1 mutants T0 and T1 as indicated for 48 hours.  
400 Immunoblot of WCEs probed for pATR,  $\gamma$ H2AX and CIP2A. Actin was used as a loading control. Quantification  
401 represents mean of three experiments. **G**, IR-induced TopBP1 foci formation in MCF10A cells transfected with  
402 *SCR* or *CIP2A* siRNA as indicated for 48 hrs. Cells were treated with 5Gy radiation for 1 hour and stained for  
403 CIP2A or TopBP1. **H**, Quantifications of the nuclear foci from (G) expressed as mean  $\pm$  SD from representative  
404 experiment of three experiments with similar results **I**, IR-induced RAD51 foci formation in mouse mammary  
405 epithelial cells (MMECs) isolated from *WT* and *Cip2a*<sup>-/-</sup> mice cultured *in-vitro* for 48 hrs, treated with 5Gy  
406 radiation for 2 hours. Images were taken at 63X on 3i spinning disk confocal and at least 150 cells quantified  
407 per each condition using speckle counter pipeline on Cell Profiler. Scale bar: 10 $\mu$ M. **J**, Quantifications of the  
408 foci in expressed as mean  $\pm$  SD of representative experiment. All statistical analyses were conducted with  
409 Welch's Student t-test for unequal variances, \*p<0.05, \*\* p<0.01, \*\*\*p<0.001. **K**, Schematic presentation of the  
410 role of CIP2A in inhibiting TopBP1-elicited G2/M checkpoint activation.

411

## 412 **Clinical and functional relevance for CIP2A in human BLBC**

413

414 In concert with the other results, across the human breast cancer subtypes, *CIP2A* mRNA  
415 was found to be highest expressed in BLBC (Fig. 5A and S5A). Notably, also *TOPBP1* was  
416 highest expressed in BLBC subtype (Fig. S5B). Although regulation of *CIP2A* expression in  
417 BLBC has not been studied, overexpression in BLBC is most likely a result of the fact that  
418 EGFR expression is the determining hallmark of BLBCs<sup>1, 2</sup> and that EGFR is known to  
419 positively regulate *CIP2A* gene expression<sup>21, 22</sup>. In addition, there is a very high prevalence  
420 of *TP53* mutations in BLBC which results in activation of *CIP2A* gene promoter activity

421 through the p21-E2F1 pathway<sup>20</sup>. Consistent with these observations, a significant  
422 correlation between *TP53* mutation, and high *CIP2A* expression was confirmed in the  
423 GSE21653 cohort (Fig. S5C). Furthermore, *CIP2A* gene promoter activity is known to be  
424 stimulated by DNA-PK<sup>42</sup>, which is overactive in BRCA-deficient cells<sup>3</sup>. The clinical  
425 relevance of *CIP2A* in BLBC was also evident from patient survival analysis. Both high  
426 mRNA and protein expression of *CIP2A* predicted poor disease-free or overall survival only  
427 in BL-TNBC, but not in non-BL-TNBC, or among unselected breast cancer patients (Fig. 5B-  
428 D, and S5D-H). Notably, the 5-year survival of patients with highly *CIP2A* positive BL-TNBC  
429 tumor was only about 50% in both patient cohorts (Fig. 5B,D), indicating that these tumors  
430 are particularly aggressive.

431  
432 To functionally assess BLBC cell dependence on *CIP2A*, we first surveyed the Dep-Map  
433 essentiality database across 33 breast cancer cell lines classified according to PAM50  
434 classification either to luminal, basal or HER2-positive. Among the 12 cell lines with CERES  
435 gene dependency score less than -0.4 for *CIP2A* loss, the majority of cell lines were found  
436 to be BLBC cells (Fig. 5E, Table S2). Notably, all except one of these most *CIP2A*-  
437 dependent BLBC cells carried either a *BRCA1* or *BRCA2* mutation (Fig. 5E). To further  
438 substantiate these results, in a genetically defined CRISPR/Cas9 model, *Cip2a* was found  
439 to be essential for colony growth of mouse mammary tumor cells depleted for *Trp53* and  
440 *Brca1* (*KB1P*; basal-type)<sup>43</sup>(Fig. 5F). However, *Cip2a* was dispensable for growth of either  
441 *Trp53/E-cadherin* mutant mammary tumor cells (*KEP*; invasive lobular carcinoma-  
442 type)<sup>44</sup>(Fig. 5F), or cells from the mice with activated AKT and loss of E-cadherin in  
443 mammary tumor cells (*WEA*; invasive lobular carcinoma-type)<sup>45</sup>(Fig. S5I). Further, RNA-  
444 sequencing analysis from the most *CIP2A*-dependent and *TP53*-mutant BLBC cell line (Fig.  
445 5G, S5J) HCC38 (*TP53* mutant/*BRCA1* promoter methylation/*BRCA2* mutant), revealed that

446 CIP2A drove a gene expression program that was consistent with its role as a BLBC driver.  
447 Specifically, CIP2A drives expression of G2/M-associated genes, as well as MYC and E2F1-  
448 driven gene expression programs (Fig. 5H). The role of CIP2A in inhibiting the  
449 dephosphorylation of the activating phosphorylation sites in both MYC and E2F1 was  
450 confirmed by western blot analyses (Fig. 5I).

451

452 These data strengthen the evidence for, and confirm the selective CIP2A-dependence of  
453 BLBC cells harboring genomic instability and HR defects. Consistent with being regulated  
454 by the key pathways of BLBC, namely MYC, E2F1, EGFR and DDR, our data reveals CIP2A  
455 as a BLBC protein driver comprehensively coordinating the molecular disease hallmarks of  
456 this disease subtype (Fig. 5J).

457

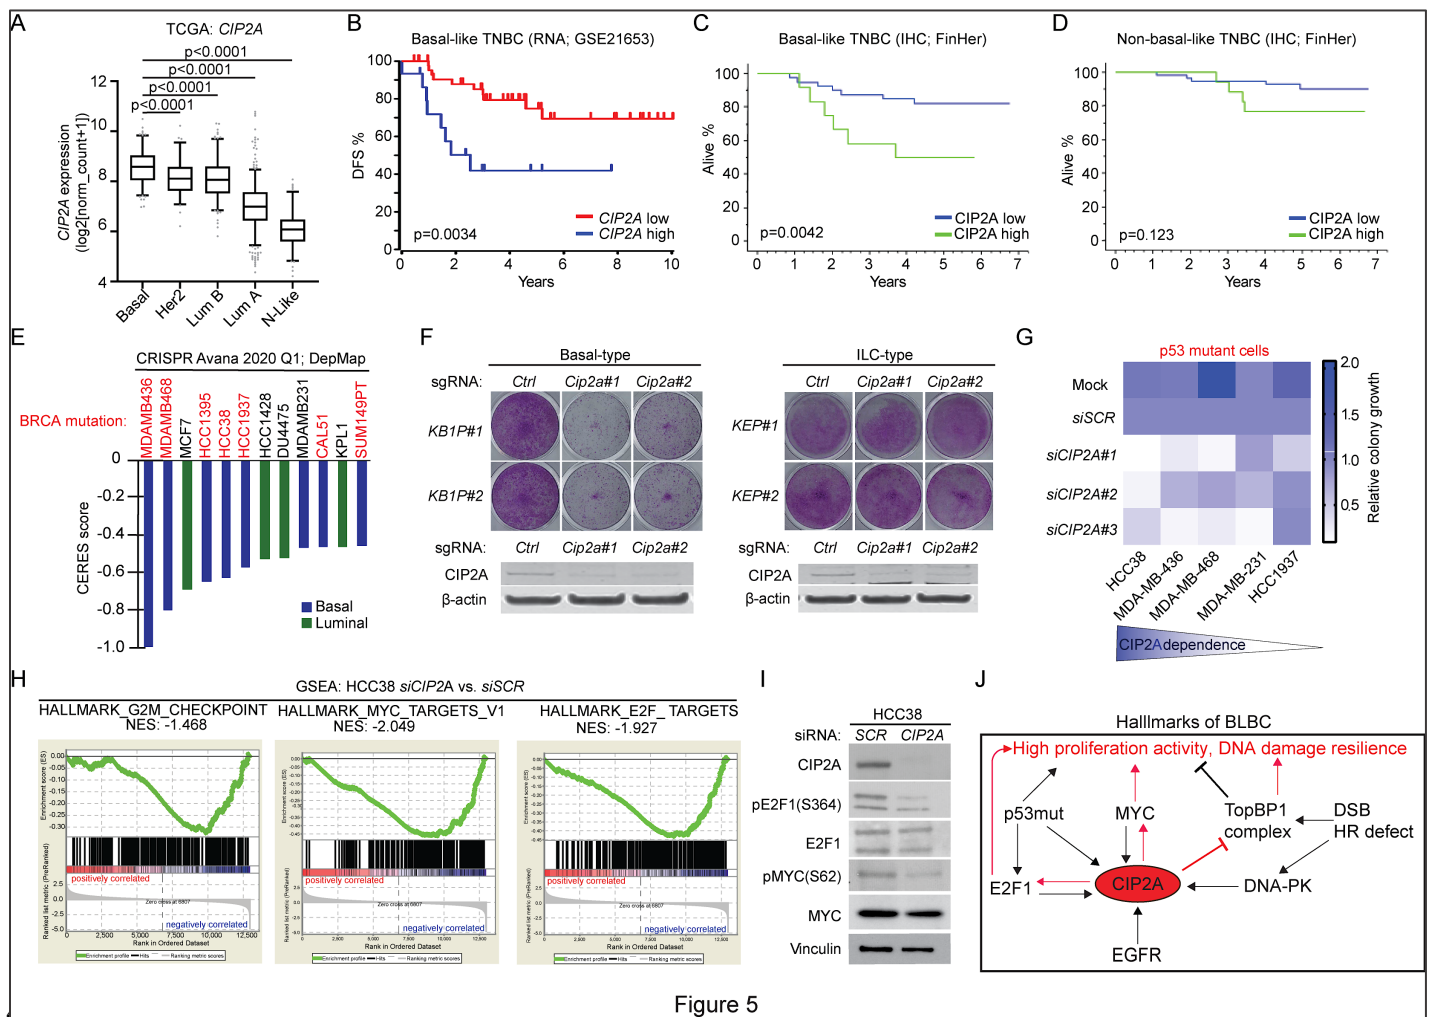

Figure 5

459 **Figure 5: CIP2A associates with poor prognosis and drives growth of BLBC cells.** **A**, Expression of  
 460 *CIP2A* mRNA in indicated molecular subtypes. Data derived from TCGA. P-values by unpaired t-test. **B**,  
 461 Disease-free survival of *CIP2A* high (n=15) and *CIP2A* low (n=45) expressing basal-like TNBC patients in  
 462 GSE21653 cohort. **C**, Overall survival of *CIP2A* high (n=12) and *CIP2A* low (n=51) basal-like TNBC patients  
 463 in FinHer cohort. **D**, Overall survival of *CIP2A* high (n=17) and *CIP2A* low (n=47) non-basal like TNBC patients  
 464 in FinHer cohort. **B-D**, P-values calculated by log-rank test. **E**, *CIP2A* dependence of breast cancer cell lines  
 465 with CERES score < -0.4 from DepMap portal (Avana 2020Q1). Lower CERES scores indicate that the cell  
 466 line is more dependent on *CIP2A*. Color coding indicates the breast cancer subtype of the cell line based on  
 467 PAM50 classification. **F**, Colony growth assays conducted on mammary tumor cell lines isolated from basal-  
 468 type (*KB1P#1* and *KB1P#2*: *Brca1* and *Trp53* mutant) and invasive lobular carcinoma (ILC)-type (*KEP#1* and  
 469 *KEP#2*: *E-Cadherin* and *Trp53* mutant) mouse models; *Cip2a* was knocked out using CRISPR/Cas9 using 2  
 470 unique gRNAs. Western blots from the same samples probed for CIP2A below. Shown are representative  
 471 images of at least 2 independent biological repeats for each cell line. **G**, Summary of *CIP2A*-dependence  
 472 on colony growth of indicated *TP53*-mutant TNBC cell lines transfected with Mock, non-targeting siRNA (*siSCR*),  
 473 or three unique *CIP2A* targeting siRNAs (*siCIP2A* #1, #2, #3). Colony areas were quantified and normalized  
 474 to *siSCR*. **H**, Gene Set Enrichment Analysis (GSEA) conducted on differentially expressed genes obtained  
 475 from RNA-seq of HCC38 cells depleted with 3 unique *CIP2A* siRNAs. **I**, HCC38 cells transfected with *SCR* or  
 476 *CIP2A* siRNAs for 72 hrs and immunoblotted for indicated protein. **J**, Schematic presentation of the role for

477 CIP2A in coordinating BLBC molecular hallmarks. Red arrows indicate mechanisms by which CIP2A drives  
478 BLBC initiation and progression. Black arrows indicate known mechanisms implicated in BLBC that either  
479 increase CIP2A expression and/or promote BLBC progression.

480

481

## 482 **Transcriptional CIP2A targeting by SMAPs as potential BLBC therapy**

483

484 Effective treatment of BLBCs represents a significant unmet medical need as a result of both  
485 intrinsic and acquired chemotherapy resistance, as well as a lack of therapeutically  
486 targetable driver alterations. To credential the role of CIP2A as a BLBC drug target, we  
487 tested whether a recently developed series of Small Molecule Activators of PP2A (SMAPs)  
488 <sup>15, 16</sup>, which have been shown to reactivate the CIP2A-targeted PP2A complex (PP2A-  
489 B56)<sup>15, 46</sup>, could be used to target CIP2A-expressing BLBC. SMAPs have thus far been  
490 shown to be effective against several MYC-driven cancer cell lines, including established  
491 TNBC cells <sup>47</sup>, but there is no information whether their therapeutic action is related to  
492 CIP2A. To start with, we verified that treatment with two independent SMAPs (DBK-1154  
493 and DT-061) resulted in a robust concentration-dependent inhibition of cell viability in eight  
494 established BL-TNBC cell lines (Fig. 6A and S6A). To ask whether SMAPs are effective  
495 against patient-derived cells, we used the recently characterized five BLBC patient-derived  
496 cancer stem cell-like lines <sup>48</sup>. Notably, consistent with notion that these cell lines were  
497 derived from tumors of patients that had undergone neoadjuvant chemotherapy, all five cell  
498 lines showed resistance to classical chemotherapies (Fig. 6B). However, regardless of their  
499 chemoresistance, these CIP2A positive (Fig. S6B) patient cells retained their sensitivity  
500 against all three tested SMAPs (DBK-1154, DT-061, NZ-1160)(Fig. 6B). Further, we used  
501 an orthotopic PDX model from a patient with *TP53* mutant, EGFR+ BLBC that was  
502 propagated *in vivo* to validate the therapeutic potential of our findings. Upon establishment  
503 of tumors, the mice were orally treated with DT-061, and tumor growth was measured.  
504 Directly supportive of their therapeutic relevance, oral DT-061 therapy resulted in significant



505 inhibition of PDX growth over the 40-day treatment period (Fig. 6C). Similar to other *in vivo*  
506 studies with SMAPs<sup>15, 47, 49, 50</sup>, we did not observe any treatment-related adverse effects in  
507 mice. Importantly the control tumors were CIP2A positive whereas tumors from DT-061  
508 treated mice showed a clear trend for reduced CIP2A protein levels (Fig. S6C,D). These  
509 results clearly indicate that pharmacological PP2A reactivation could represent a novel  
510 therapeutic strategy for the treatment of therapy-resistant and CIP2A positive BLBCs.

511

512 Surprisingly, but related to potential link between SMAP response and CIP2A, western blot  
513 analyses revealed a potent inhibition of CIP2A protein expression by SMAPs at 24 hours in  
514 both the established cells, and in patient-derived cells (Fig. 6D,E and S6E-G). Indicative of  
515 transcriptional level regulation, CIP2A protein inhibition was accompanied with inhibition of  
516 *CIP2A* mRNA expression (Fig. 6F and S6G). Furthermore, rescue of CIP2A by exogenous  
517 overexpression shifted the SMAP IC<sub>50</sub> response of basal-like immortalized MCF-10A cells  
518 (Fig. 6G, and S6H). SMAPs, albeit not equaling direct CIP2A inhibition, but representing  
519 now surrogate CIP2A inhibitors, were next tested for possible effects on biomarkers of  
520 CIP2A activity. Consistent with results in CIP2A-inhibited cells (Fig. 4), SMAPs induced  
521 potent checkpoint signaling exemplified by phosphorylation of ATR and H2AX, as well as  
522 phosphorylation of ATM and CHK2 (Fig. 6H,I and S7A). SMAP treatment also resulted in  
523 inhibition of MYC expression (Fig. 6J). Notably, especially p-ATR and  $\gamma$ H2AX induction by  
524 SMAP occurred after CIP2A protein inhibition (Fig. 6K and S7D,E). Furthermore, CIP2A  
525 overexpression significantly rescued SMAP-elicited  $\gamma$ H2AX induction (Fig. 6L). These  
526 results reveal that SMAPs have bi-phasic therapeutic activity consisting of direct PP2A  
527 activation<sup>15, 16</sup>, followed by transcriptional inhibition of *CIP2A* expression discovered here  
528 (Fig. 6M).

529

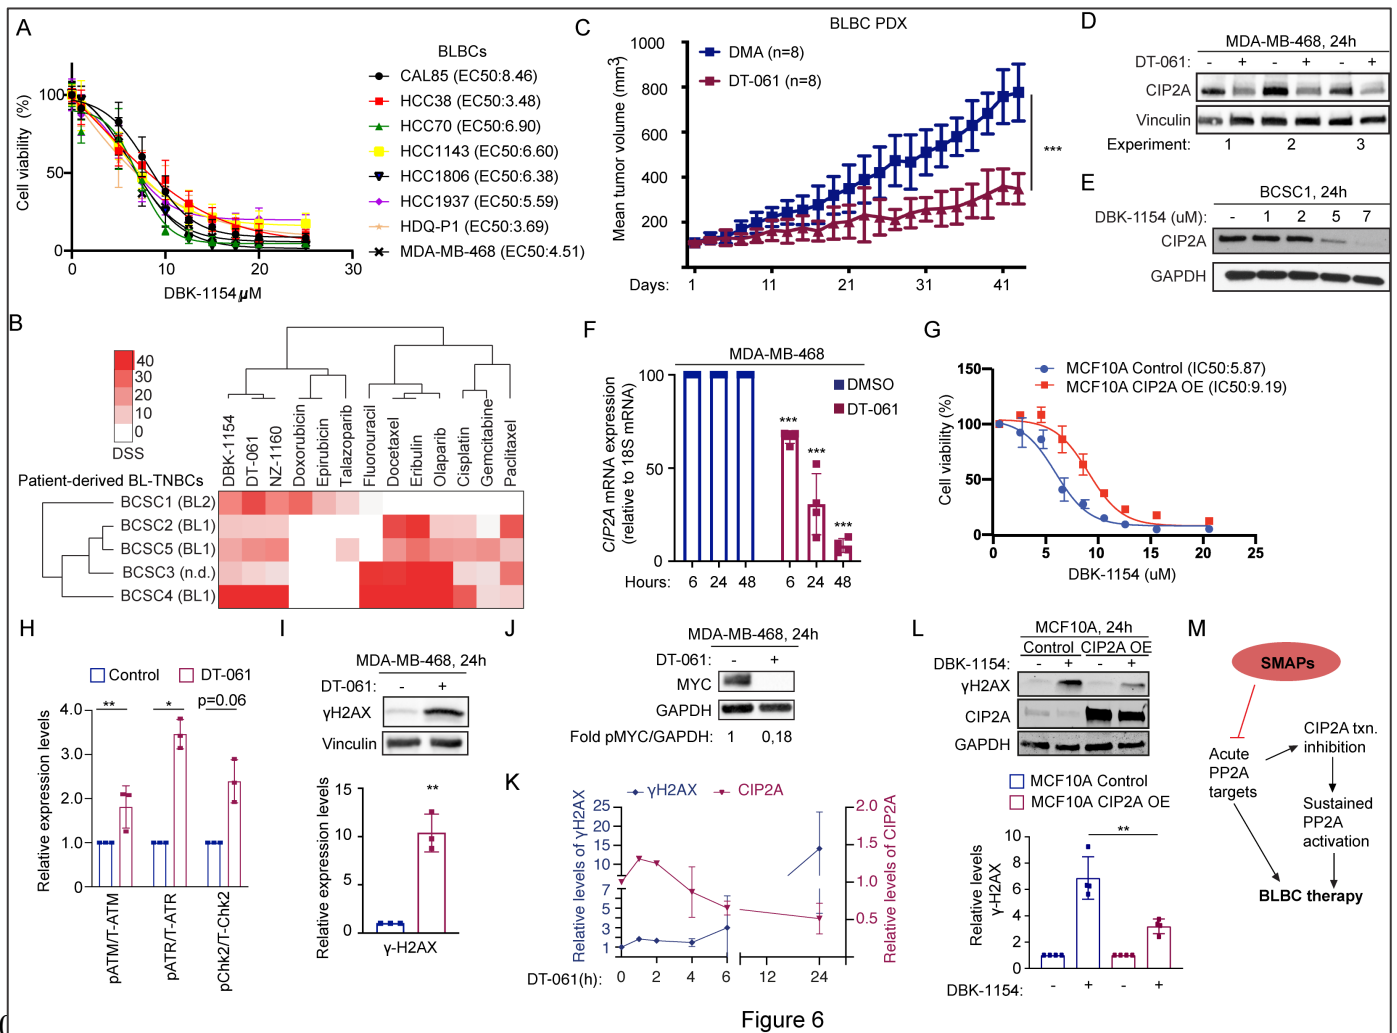

Figure 6

530

531 **Figure 6: CIP2A targeting by SMAPs as potential BLBC therapy** **A**, SMAP (DBK-1154) sensitivity profiles  
 532 of eight BL-TNBC cell lines. Cell viabilities were measured using CellTiterGlo Luminescence OE Assay after 24  
 533 hrs of drug treatment. EC50s are listed in parentheses **B**, Screening of patient-derived BLBC stem cell like  
 534 cells for chemotherapy and SMAP responses. Heatmap indicates the drug sensitivity scores (DSS) of these  
 535 cells across standard chemotherapeutics and three SMAPs DBK-1154, DT-061, NZ-1160). Higher DSS value  
 536 indicates higher sensitivity. **C**, Tumor growth of an orthotopic patient derived xenograft model of basal triple  
 537 negative breast cancer treated with DMA or 5mpk BID SMAP DT-061 for 43 days. Respective quantifications  
 538 are represented as mean  $\pm$  SD. **D,E**, SMAP treatment leads to CIP2A depletion. CIP2A western blots from  
 539 MDA-MB-468 (D) and patient-derived stem cell-like cells (14-72)(E) on treatment with indicated SMAPs for  
 540 24h. DT-061 and DBK-1154 concentration 20  $\mu$ M. **F**, Kinetics of *CIP2A* mRNA expression from MDA-MB-468  
 541 cells after treatment with 20uM of DT-061. n=3 expressed as mean  $\pm$  SD. **G**, Dose response curve of control  
 542 and CIP2A OE stable cell line (CIP2A OE) MCF10A cells on treatment with concentration series of DBK-1154  
 543 for 24 hours. IC50 values indicated in parentheses. **H**, Quantification of western blots displayed in S7A

544 expressed as mean  $\pm$  SD from n=3 replicates normalized to the untreated controls. **I,J**, Western blots of MDA-  
545 MB-468 cell line treated with 20 $\mu$ M SMAP DT-061 for 24 hrs and probed for  $\gamma$ H2AX and MYC;  $\gamma$ H2AX  
546 quantifications from n=3 replicates displayed below (I). Values for MYC represent mean of two experiments  
547 **K**, Time course of CIP2A and  $\gamma$ H2AX protein expression in MDA-MB-468 treated with DT-061 (20  $\mu$ M) for  
548 indicated time periods. Western blot data are shown in Fig. S7B. **L**, CIP2A overexpression in MCF10A cell line  
549 rescues the SMAP-elicited  $\gamma$ H2AX activation effects. Western blots of parental and CIP2A OE MCF10A cells  
550 treated with SMAP DBK-1154 for 24hrs and probed for  $\gamma$ H2AX. GAPDH is used as loading control;  $\gamma$ H2AX  
551 quantifications from n=4 replicates displayed below. **A-L**, p-values calculated using unpaired t-test, \*P<0.05,  
552 \*\*P<0.01, \*\*\* P<0.001, \*\*\*\*P<0.0001. **M**, Schematic model of bi-phasic therapeutic action of SMAPs in BLBCs.  
553 SMAP treatment of cells results in acute inhibition of PP2A phosphotargets involved in both CIP2A regulation  
554 and BLBC growth. The acute SMAP response is sustained by PP2A reactivation resulting from SMAP-elicited  
555 CIP2A inhibition. txn; transcription.  
556  
557

## 558 Discussion

559

560 Breast cancers are a heterogeneous group of malignant diseases. Whereas driver  
561 mechanisms and therapeutic strategies for steroid hormone receptor-positive cancers and  
562 HER2-positive breast cancers are more established; BLBCs, lack identified genetic drivers,  
563 and their therapies are often limited to relatively untargeted systemic therapies, such as  
564 conventional chemotherapy<sup>1, 2</sup>. The lack of defined driver mechanism(s) is thus one  
565 important reason for overall poor patient survival especially in BLBCs. In this study we  
566 provide compelling cell based and *in vivo* evidence for a central role for CIP2A as a non-  
567 genetic driver of BLBC initiation and progression, and identify SMAPs as potential novel  
568 therapy for aggressive CIP2A positive BLBC tumors.

569

570 *CIP2A* gene sequence is not altered in BLBCs (<https://cancer.sanger.ac.uk/cosmic>).  
571 Instead, its expression is enhanced due to constitutive DDR activity<sup>42, 51</sup>, TP53 inactivation  
572<sup>20</sup>, and EGFR pathway activation<sup>21</sup>, which are all molecular hallmarks of BLBC<sup>1, 3</sup>. Our data  
573 expand on these findings by demonstrating induction of *Cip2a* mRNA expression in  
574 premalignant mammary tissue of DMBA-treated mice (Fig. 2A). This can be explained by  
575 the aforementioned DDR activity, but also by DMBA-induced activation of other pro-  
576 tumorigenic pathways such as the MEK-ERK pathway and MYC (Fig. 2B), known to  
577 stimulate *CIP2A* transcription<sup>18</sup>. Therefore, transcriptional *CIP2A* induction early in DMBA-  
578 induced tumorigenesis is fully supportive of its role as a BLBC driver essential for tumor  
579 initiation. Later in the human BLBC progression when TP53 is lost, *CIP2A* transcription is  
580 permanently enhanced by increased p21-E2F1 activity<sup>20</sup>. Together these findings provide  
581 an explanation for high *CIP2A* expression in BLBC (Fig. 5A), and a functional link between  
582 two human major tumor suppressors, TP53 and PP2A.

583

584 Although PP2A inhibitor proteins have oncogenic functions, none of them, including CIP2A,  
585 have been shown to be essential for *in vivo* tumorigenesis. As opposed to previous  
586 assumptions that CIP2A is involved in the development of multiple human solid cancers <sup>18</sup>,  
587 including breast cancers, our results demonstrate striking selectivity in essentiality for CIP2A  
588 in the initiation and progression of BLBCs. Whereas *Cip2a* was required for DMBA-induced  
589 mouse BLBC initiation, it was not essential for initiation of DMBA-induced lung, ovary, skin,  
590 or stomach tumors (Fig 1D). We further confirmed that *Cip2a* was dispensable for skin and  
591 ovarian tumorigenesis by independent *in vivo* models. Further, in genetically defined cell  
592 culture models, the *Brca1/Trp53* mutant basal-like cells, but not the invasive lobular  
593 carcinoma-type mouse mammary tumor cells were dependent on *Cip2a* for their colony  
594 growth. Of clinical relevance, in human breast cancer samples, both at mRNA and protein  
595 level, high CIP2A expression predicted for poor patient survival exclusively in BLBCs, but  
596 not in other studied breast cancer subtypes. Importantly, our results also provide a plausible  
597 mechanistic explanation for the noted dependency of CIP2A both for initiation and  
598 progression in BLBCs. We note that *CIP2A* is not only itself regulated by BLBC hallmarks,  
599 but also controls many of the molecular hallmarks of BLBC<sup>1, 3</sup>, including survival promotion  
600 of *TP53/BRCA*-deficient cells, high MYC and E2F1 transcriptional activity, as well as  
601 resilience of cell proliferation under a high degree of DNA damage (Fig. 5J). Although these  
602 are also important mechanisms for HGSOC development, our results suggest that CIP2A  
603 has differential effects on DDR proteins essential for BLBC or HGSOC. Together these data  
604 provide compelling evidence to support discovery of CIP2A as a specific BLBC driver protein  
605 implicated both in tumor initiation and progression.

606

607 Through genome-wide dependence mapping, CIP2A was identified as a functional  
608 homologue for several critical DNA damage proteins. Although it is very likely that also the  
609 other DDR proteins identified in the functional network with CIP2A contribute to phenotypes  
610 in CIP2A-deficient cells, we focused on validation of functional interaction between CIP2A  
611 and TopBP1. We demonstrate both a direct protein interaction between CIP2A and TopBP1  
612 and that CIP2A prevents retention of TopBP1 and RAD51 on damaged chromatin in  
613 premalignant basal-like mammary cells. Thus, in *CIP2A* deficient cells TopBP1 can induce  
614 effective DDR, whereas in pre-malignant *CIP2A* positive cells the DDR is dampened which  
615 allows for continued mitotic activity (Fig. 4K)<sup>8, 10, 11, 40, 41</sup>. Importantly the link between CIP2A  
616 and DDR may also provide a plausible explanation for the dilemma that PP2A inhibition  
617 should not be essential for tumorigenesis in mouse cells<sup>52</sup>. While it has been convincingly  
618 shown that PP2A inhibition is not required for mouse cell transformation by hyperactivated  
619 RAS<sup>52</sup>, CIP2A's role in DNA-damage-induced cell transformation may not follow the rules  
620 of RAS-dependent transformation. Specifically, even though CIP2A-mediated PP2A  
621 inhibition supports phosphorylation of MYC, E2F1 and NBN relevant to this study<sup>20, 35, 53</sup>, it  
622 is possible that CIP2A-mediated BLBC initiation is not fully dependent on PP2A inhibition,  
623 but may also result from CIP2A's role as a direct TopBP1 interacting protein, and  
624 consequent PP2A-independent effects of CIP2A on TopBP1 function.

625  
626 In addition to identifying CIP2A as a protein driver for BLBC, we demonstrate that a first-in-  
627 class series of small molecule activators of PP2A (SMAPs)<sup>15, 16</sup>, function as inhibitors of  
628 *CIP2A* expression. Our results reveal a model where SMAPs initially directly activate PP2A-  
629 B56<sup>15</sup>, and lead to a prolonged response by transcriptional downregulation of the PP2A-  
630 B56 inhibitor *CIP2A* (Fig. 6M). The mechanisms for SMAP-elicited *CIP2A* mRNA inhibition  
631 has yet to be elucidated, but as *CIP2A* promoter activity is stimulated both by MEK-ERK-

632 ETS pathway <sup>21</sup>, and by MYC <sup>54</sup>, and SMAPs inhibit both ERK activity and MYC (Fig. 6J),  
633 these findings provide a plausible mechanistic explanation for the *CIP2A* mRNA inhibition  
634 by SMAPs. Importantly, we were also able to demonstrate that CIP2A overexpression partly  
635 rescued the effects of SMAPs as assessed by both cell viability and DDR regulation.  
636 However, it is important to note that we consider SMAPs as surrogate CIP2A inhibitors that  
637 also have acute effects not mediated by CIP2A inhibition <sup>15</sup>, thereby explaining the effects  
638 of SMAPs also in other types of cancer cells <sup>47, 49, 50</sup>. Importantly, we validated the  
639 therapeutic effect of several SMAPs across 15 different cell lines, including 6 individual  
640 patient-derived lines and a PDX model, together minimizing cautions related to known  
641 intratumoral heterogeneity of BLBC tumors <sup>55</sup>. The effects on MCF-10A cells also indicate  
642 potential usefulness of SMAPs in eradicating the low transformation level basal-like  
643 mammary epithelia cells. Our xenograft data provide first evidence for *in vivo* efficacy of  
644 SMAPs on patient-derived BLBC cells. However, this is directly supported by recent data  
645 demonstrating that both CIP2A inhibition, and SMAP treatment can significantly inhibit  
646 xenograft growth of established TNBC cell lines <sup>28, 32, 47</sup>. Based on our results with PARP  
647 inhibitors, and recent studies implicating that PP2A reactivation potentiates the therapeutic  
648 effects of numerous different types of drugs <sup>35, 50</sup>, future studies should be directed towards  
649 comprehensive screening efforts to the most efficient combination therapies with SMAPs for  
650 patients with aggressive CIP2A positive BLBC tumors. Another very interesting future  
651 direction would be to test the effects of SMAPs on brain metastasis of BLBCs, as SMAPs  
652 were recently shown to cross blood-brain-barrier, and to induce significant survival effects  
653 in an intracranial glioblastoma model <sup>49</sup>.

654

655 Together these results credential a therapeutically actionable driver protein for one of the  
656 most aggressive human cancer types, BLBCs. We also discover novel link between CIP2A

657 and DDR via direct interaction with TopBP1. More generally, these results emphasize the  
658 importance in characterizing and functionally validating protein level dysregulation of key  
659 signaling effectors in cancer types for which apparent genetic drivers are lacking.



## 660 **Materials and Methods**

661

### 662 Mouse experiments

663 In order to develop DMBA-induced tumors in *WT* and *Cip2a*<sup>-/-</sup> female mice, they were  
664 administered with 1mg of DMBA dissolved in 200µl of corn oil by oral gavage once a week  
665 for 6 weeks starting at 12-14 weeks of age as previously described <sup>26</sup>. The mice were  
666 monitored twice a week for tumor formation until morbidity. Mice were sacrificed upon tumor  
667 burden and/or when they showed general signs of illness. Upon autopsy tumors in different  
668 tissues were recorded and collected. To analyze DMBA-induced mutation load and *Cip2a*  
669 mRNA expression in *WT* and *Cip2a*<sup>-/-</sup> premalignant mammary gland tissues, the mice were  
670 sacrificed 2 weeks after the last DMBA treatment and tissues were collected for further  
671 analysis. DMBA/TPA protocol for skin tumorigenesis and experiments with *Cip2a*<sup>+/-</sup> mice  
672 crossed with an ovarian cancer mouse model *TgMISIIR-Tag* are described in supplementary  
673 materials and methods. Tissue samples collected for extraction of RNA and genomic DNA  
674 were snap frozen into liquid nitrogen. Tissue samples for histochemical and for  
675 immunohistochemical analysis were fixed in formalin.

676

677 Mouse mammary epithelial cells (MMECs) were isolated from 3 to 4 months old *Cip2a*<sup>-/-</sup>  
678 and *WT* mice and cultured *in vitro* as described in <sup>56</sup>. Briefly, mammary glands (without  
679 lymph nodes) from 3-4 mice per genotype were pooled together in cold PBS, minced using  
680 scalpels and collected to warm collagenase solution. The samples were agitated for 2 to 3  
681 hours at 37°C and resuspended in DMEM/F12 isolation medium containing 20 U/ml DNase  
682 I. They were subjected to a few rounds of pulse centrifugations (1500G) until contaminating  
683 red blood cells (RBCs) disappeared from the pellet. The final clear cell pellets (containing  
684 mammary epithelial ducts) were dissociated into single cells using Accutase (StemCell

685 Technologies). The obtained single cells were cultured using DMEM/F12 culture medium  
686 for IF experiments or used directly for flow cytometry. The recipes of the different media  
687 used in the process are listed and described in Table S3.

688

689 Mouse tumor cell lines were generated from spontaneous mammary tumors of following  
690 breast cancer mouse models: *K14Cre; Brca1<sup>F/F</sup>; Trp53<sup>F/F</sup>(KB1P)*<sup>43</sup>, *K14Cre; Cdh1<sup>F/F</sup>;*  
691 *Trp53<sup>F/F</sup>(KEP)*<sup>44</sup> and *Wap-cre; Cdh1<sup>F/F</sup>; Akt1<sup>E17K</sup>(WEA)*<sup>45</sup>. Tumor cell lines were generated  
692 by collecting tumors in cold PBS and minced by chopping with scalpels. Aggregates were  
693 plated out. *KEP* and *WEA* tumor cell line cultures were incubated at 37°C with 5% CO<sub>2</sub> and  
694 20% O<sub>2</sub>. *KB1P* cell lines were incubated at 37°C with 5% CO<sub>2</sub> and 3% O<sub>2</sub>. Homogenous  
695 epithelial cell morphology was obtained after cultures were passaged 2-3 times. Used cell  
696 culture media are described in Table S3.

697

#### 698 Cell culture and transfections

699 All the commercial cell lines used in this paper were purchased from American Type Culture  
700 Collection (ATCC) or Leibniz Institute's German Collection of Microorganisms and Cell  
701 Cultures (DSMZ). All the cells in culture were negative on periodically testing for  
702 mycoplasma using Mycoplasma Detection Kit (Roche). All the human and mouse cells, their  
703 culture conditions and supplements used for cell culture are listed in Table S3. Breast cancer  
704 stem-like cells (BCSCs) were isolated from TNBC patients who received standard  
705 chemotherapy and cultured as described previously<sup>48</sup>. MCF10A stable cell lines  
706 overexpressing CIP2A-V5 and empty vector (MCF10A-CIP2A OE and MCF10A-Control)  
707 were generated using the lentiviral constructs pWPI-CIP2A-V5 and pWPI respectively. After  
708 transduction with lentiviral particles, successfully transfected (GFP positive) cells were  
709 sorted using SH800 Cell Sorter (Sony). Plasmid DNAs and siRNAs were transfected using

710 Jet Prime (Polyplus Transfection) and Oligofectamine (Thermo Fisher Scientific) reagents  
711 respectively as per manufacturer's protocols. DNAs were transfected for 48 hours and  
712 siRNAs were transfected for 48 to 72 hours until use for further experiments.

713

#### 714 CRISPR/Cas9 mediated gene disruption

715 In order to knockout *Cip2a*, mouse mammary tumor cell lines were transduced with lentiviral  
716 vectors lentiCas9-Blast carrying Cas9 and with lentiGuide-Puro containing sgRNA against  
717 mouse *Cip2a* or a control non-targeting (NT) sgRNA. Plasmid details in Table S4. The used  
718 two sgRNA sequences against *Cip2a* were selected from a genome-wide library of  
719 guideRNAs (Genome-scale CRISPR Knock-Out (GeCKO) v2.0)<sup>57</sup>. Cloning of sgRNAs into  
720 lentiGuide-Puro vector was performed as previously described<sup>58</sup>. Cloned vectors were  
721 verified by Sanger sequencing. After selection of lentiCas9-Blast transduced cells, they were  
722 transduced with and selected for lentiGuide-Puro. Knockout efficiency was determined by  
723 analyzing CIP2A protein expression by western blot.

724

#### 725 Antibodies, RNAs, primers, and DNA constructs

726 Antibodies (along with dilutions for each application), plasmids and sequences of siRNAs,  
727 gRNAs and primers used are listed in Table S4.

728

#### 729 Co-immunoprecipitations

730 Co-IP experiments were conducted using the optimized protocols previously published for  
731 GFP tagged chromatin bound proteins, kindly provided by Prof. Andrew Blackford,<sup>59, 60</sup>.  
732 Briefly, HEK293 cells were transfected with indicated plasmids for 48 hours. Cells were lysed  
733 using IP lysis buffer (containing 100mM NaCl, 1mM MgCl<sub>2</sub>, 10% glycerol, 0.2% Igepal  
734 CA630, 5mM NaF and 50mM Tris, pH 7.5) supplemented with 1X EDTA-free protease

735 inhibitor tablet (Roche) and 25 units/ml Benzonase (Millipore) and rotated on a roller at 4°C  
736 for 20 minutes. After digestion of DNA and nuclear components, final concentration of NaCl  
737 and EDTA in the samples was adjusted to 200mM and 2mM respectively and rotated for  
738 another 10 minutes. The lysates were then cleared by high speed centrifugation (16000  
739 rpm) for 15 minutes and 5% of the supernatant was kept aside as Inputs. The rest of the  
740 lysate was added to 20µl of GFP-Trap agarose beads (ChromoTek) and rotated on a roller  
741 at 4°C for 2-3 hours. The GFP bound complexes were washed 3-4 times and eluted using  
742 2X Sample buffer. Protein interactions were assessed by western blot of Input and Co-IP  
743 samples.

744

#### 745 Immunofluorescence

746 MMECs and MCF10A cells were cultured in ibidi 8 well µ slides (ibiTreat #80826) for 24  
747 hours. Cells were irradiated with 5Gy ionizing X-ray radiation (IR) using Faxitron Multirad  
748 350. After the indicated time points, cells were fixed with 4% PFA for 15 minutes at room  
749 temperature (RT), permeabilized with 1% TritonX-100 in PBS for 15 minutes and blocked  
750 with 10% goat serum in PBS for 30 minutes. Primary antibodies were incubated overnight  
751 at 4°C and next day, Alexa Fluor conjugated secondary antibodies were incubated for 1 hour  
752 at room temperature. The Nuclei were counter stained using DAPI (Invitrogen). The nuclear  
753 foci were imaged using Zeiss LSM780 or 3i CSU-W1 Spinning disc confocal microscope  
754 (63X objective). Z-stack images were taken and maximum Z intensity projection images  
755 were used for image analysis. Nuclear foci were quantified using Speckle counter pipeline  
756 in Cell Profiler software <sup>61</sup>. A minimum of 100 nuclei were counted for each condition. Each  
757 experiment was repeated with identical conditions 3 times.

758

759

760 Mitotic index experiments

761 Mitotic index experiments were conducted by modifying previously published protocol  
762 described in <sup>8</sup>. Briefly, MCF10A cells were transfected with indicated siRNAs for 24 hours,  
763 following which they were seeded into ibidi 8 well  $\mu$  slides (ibiTreat #80826) for 24 hours.  
764 Cells were irradiated with 10Gy radiation followed by Nocodazole block (100ng/ml), one  
765 hour after IR for 18 hours. After the indicated time points, cells were stained for phospho-  
766 Histone H3 (Ser10) using similar immunofluorescence protocols as mentioned above.  
767 Images were taken on Zeiss Axiovert or EVOS fl Microscope with 10X objective and  
768 quantified using ImageJ software. Experiment was repeated 3 times.

769

770 Protein isolation and western blotting

771 Protein lysates were prepared from cells by using RIPA buffer (50 mM Tris-HCl, pH 7.4, 150  
772 mM NaCl, 1% NP-40, 0.5% DOC, 0.1% SDS, 2 mM EDTA) supplemented with protease  
773 and phosphatase inhibitors (Roche). Protein concentration was quantified using the BCA  
774 protein assay kit (Pierce). Equal amount of protein lysate was loaded with NuPage LDS  
775 Sample Buffer (ThermoFisher) onto 4–20% Mini-PROTEAN® TGX™ Precast Protein Gels  
776 (BioRad) or NuPage 4-12% Bis-Tris gradient gels (Invitrogen) and transferred onto Trans-  
777 Blot Turbo Midi Nitrocellulose membranes (BioRad) using Trans-Blot Turbo Transfer  
778 System (BioRad). Membranes were blocked with 5% milk in TBS-T or 10% Western Blot  
779 Blocking Reagent (Roche) followed by primary antibody incubation overnight at 4°C.  
780 Secondary antibodies were incubated for 1 to 2 hours at room temperature and membranes  
781 were imaged. For HRP antibodies detection was done using ECL based Curix 60 film  
782 processor (Agfa) and for IRDye Conjugated secondary antibodies Odyssey CLx imaging  
783 system was used.

784

785 Colony formation assay

786 Optimized number of untransfected (Mock), non-targeting siRNA (*siSCR*) and 3 unique  
787 *CIP2A* targeting siRNA (*siCIP2A #1*, *siCIP2A#2*, *siCIP2A#3*) transfected HCC38, MDA-MB-  
788 436, MDA-MB-468, MDA-MB-231 and HCC1937 cells (2000-10,000 cells per well) were  
789 seeded in 12-well plates. In MDA-MB-231 cells, for testing PARP inhibitor sensitivity after  
790 *CIP2A* depletion, optimized number of *siSCR* and *siCIP2A* transfected cells were treated  
791 with indicated concentrations of PARP inhibitors (Olaparib and Niraparib) for 48 hours. After  
792 7-10 days, colonies were fixed with cold methanol. Optimized number of control and *Cip2a*  
793 knock out *KB1P*, *KEP* or *WEA* cells (5000-20000 cells), were seeded into 12-well plates  
794 after transduction of and selection for lentiCas9-Blast and lentiGuide-Puro vector. After 5-7  
795 days cell colonies were fixed and stained with 0.2% crystal violet solution prepared in 10%  
796 ethanol for 15 minutes at room temperature. Excess stain was removed by repeated  
797 washing with PBS or water. The colony areas were quantified using ColonyArea plugin<sup>62</sup> in  
798 Image J.

799

800

801 **Acknowledgements**

802

803 We thank all Westermarck lab members for support during the project and especially Taina  
804 Kalevo-Mattila for technical assistance. Erica Nyman is thanked for help in IHC analysis.  
805 Professor Wojciech Niedzwiedz is thanked for GFP tagged-TopBP1 mutants and Dr.  
806 Andrew Blackford for sharing protocols. We are very grateful to Ruth Keri Lab from Case  
807 Western Reserve University for sharing the PDX model. Professor Johanna Ivaska is  
808 acknowledged for her valuable comments to the manuscript. We acknowledge important  
809 contributions by Finnish Functional Genomics Center, Cell Imaging and Cytometry core  
810 facility, and Genome Editing Core at Turku Bioscience Centre, and Turku Centre for Disease  
811 Modeling (TCDM) all supported by Biocenter Finland, and/or ELIXIR Finland. The Central  
812 Laboratory Animal Facilities of University of Turku are acknowledged for the genotyping,  
813 husbandry and exportation of the mice models used in this study. The project was funded  
814 by Academy of Finland (323096 for EP and 296801, 314443 and 310561 for LE), Finnish  
815 Cancer Foundations (JW), Finnish Cultural Foundation, Sigrid Juselius Foundation (JW,  
816 LE), Breast Cancer Now (JW, KW), and Governmental Research Funding for Turku  
817 University Hospital (TG). DCC is supported by the Fox Chase Cancer Center FCCC Core  
818 Grant NCI P30 CA006927. GN is supported by R01 CA181654, HL144741, CA240993,  
819 W81XWH-19-BCRP-BTA12 DOD and Rogel Cancer Gift Funds. JM is supported by  
820 Deutsche Forschungsgemeinschaft (DFG, German Research Foundation;  
821 PN(407869199)). AL was supported by OncoCode Institute, Svenska Kulturfonden, Orion  
822 Research Foundation, Relander Foundation, Inkeri and Mauri Vänskä's Foundation, Finnish  
823 Cultural Foundation's Varsinais-Suomi Regional Fund and by K. Albin Johanssons Stiftelse.

824

825

826 **Conflicts of Interest**

827 The Icahn School of Medicine at Mount Sinai has filed patents covering composition of  
828 matter on the small molecules disclosed herein for the treatment of human cancer and other  
829 diseases (International Application Numbers: PCT/US15/19770, PCT/US15/19764; and US  
830 Patent: US 9,540,358 B2). Mount Sinai is actively seeking commercial partners for the  
831 further development of the technology. G.N. has a financial interest in the commercialization  
832 of the technology. No other conflicts of interests.

833

834 **References:**

- 835 1. Denkert, C., Liedtke, C., Tutt, A. & von Minckwitz, G. Molecular alterations in triple-  
836 negative breast cancer-the road to new treatment strategies. *Lancet* **389**, 2430-2442  
837 (2017).
- 838 2. Rakha, E.A., Reis-Filho, J.S. & Ellis, I.O. Basal-like breast cancer: a critical review. *J*  
839 *Clin Oncol* **26**, 2568-2581 (2008).
- 840 3. Duijf, P.H.G. *et al.* Mechanisms of Genomic Instability in Breast Cancer. *Trends in*  
841 *molecular medicine* **25**, 595-611 (2019).
- 842 4. Bartek, J., Lukas, C. & Lukas, J. Checking on DNA damage in S phase. *Nat Rev Mol*  
843 *Cell Biol* **5**, 792-804 (2004).
- 844 5. Giunta, S. & Jackson, S.P. Give me a break, but not in mitosis: the mitotic DNA  
845 damage response marks DNA double-strand breaks with early signaling events. *Cell*  
846 *Cycle* **10**, 1215-1221 (2011).
- 847 6. Zheng, X.F., Kalev, P. & Chowdhury, D. Emerging role of protein phosphatases  
848 changes the landscape of phospho-signaling in DNA damage response. *DNA repair*  
849 **32**, 58-65 (2015).



- 850 7. Pedersen, R.T., Kruse, T., Nilsson, J., Oestergaard, V.H. & Lisby, M. TopBP1 is  
851 required at mitosis to reduce transmission of DNA damage to G1 daughter cells. *J*  
852 *Cell Biol* **210**, 565-582 (2015).
- 853 8. Cotta-Ramusino, C. *et al.* A DNA damage response screen identifies RHINO, a 9-1-  
854 1 and TopBP1 interacting protein required for ATR signaling. *Science* **332**, 1313-  
855 1317 (2011).
- 856 9. Sokka, M., Parkkinen, S., Pospiech, H. & Syvaoja, J.E. Function of TopBP1 in  
857 genome stability. *Subcell Biochem* **50**, 119-141 (2010).
- 858 10. Kim, W.J., Lee, H., Park, E.J., Park, J.K. & Park, S.D. Gain- and loss-of-function of  
859 Rhp51, a Rad51 homolog in fission yeast, reveals dissimilarities in chromosome  
860 integrity. *Nucleic Acids Res* **29**, 1724-1732 (2001).
- 861 11. Klein, H.L. The consequences of Rad51 overexpression for normal and tumor cells.  
862 *DNA repair* **7**, 686-693 (2008).
- 863 12. Liu, Y. & Smolka, M.B. TOPBP1 takes RADical command in recombinational DNA  
864 repair. *J Cell Biol* **212**, 263-266 (2016).
- 865 13. Moudry, P. *et al.* TOPBP1 regulates RAD51 phosphorylation and chromatin loading  
866 and determines PARP inhibitor sensitivity. *J Cell Biol* **212**, 281-288 (2016).
- 867 14. Ogiwara, H. *et al.* Dpb11, the budding yeast homolog of TopBP1, functions with the  
868 checkpoint clamp in recombination repair. *Nucleic Acids Res* **34**, 3389-3398 (2006).
- 869 15. Leonard, D. *et al.* Selective PP2A Enhancement through Biased Heterotrimer  
870 Stabilization. *Cell* **181**, 688-701 (2020).
- 871 16. Westermarck, J. & Neel, B.G. Piecing Together a Broken Tumor Suppressor  
872 Phosphatase for Cancer Therapy. *Cell* **181**, 514-517 (2020).
- 873 17. Kauko, O. & Westermarck, J. Non-genomic mechanisms of protein phosphatase 2A  
874 (PP2A) regulation in cancer. *Int J Biochem Cell Biol* **96**, 157-164 (2018).

- 875 18. Khanna, A. & Pimanda, J.E. Clinical significance of Cancerous Inhibitor of Protein  
876 Phosphatase 2A (CIP2A) in human cancers. *Int J Cancer* (2015).
- 877 19. Côme, C. *et al.* CIP2A is associated with human breast cancer aggressivity. *Clin*  
878 *Cancer Res* **15**, 5092-5100 (2009).
- 879 20. Laine, A. *et al.* Senescence sensitivity of breast cancer cells is defined by positive  
880 feedback loop between CIP2A and E2F1. *Cancer discovery* **3**, 182-197 (2013).
- 881 21. Khanna, A. *et al.* ETS1 mediates MEK1/2-dependent overexpression of cancerous  
882 inhibitor of protein phosphatase 2A (CIP2A) in human cancer cells. *PLoS ONE* **6**,  
883 e17979 (2011).
- 884 22. Chao, T.T. *et al.* Afatinib induces apoptosis in NSCLC without EGFR mutation  
885 through Elk-1-mediated suppression of CIP2A. *Oncotarget* **6**, 2164-2179 (2015).
- 886 23. Ventelä, S. *et al.* CIP2A promotes proliferation of spermatogonial progenitor cells and  
887 spermatogenesis in mice. *PLoS ONE* **7**, e33209 (2012).
- 888 24. Gao, J., Mitchell, L.A., Lauer, F.T. & Burchiel, S.W. p53 and ATM/ATR regulate 7,12-  
889 dimethylbenz[a]anthracene-induced immunosuppression. *Molecular pharmacology*  
890 **73**, 137-146 (2008).
- 891 25. Kucab, J.E. *et al.* A Compendium of Mutational Signatures of Environmental Agents.  
892 *Cell* **177**, 821-836 e816 (2019).
- 893 26. Kim, S., Roopra, A. & Alexander, C.M. A phenotypic mouse model of basaloid breast  
894 tumors. *PLoS ONE* **7**, e30979 (2012).
- 895 27. Nicol, C.J. *et al.* PPARgamma influences susceptibility to DMBA-induced mammary,  
896 ovarian and skin carcinogenesis. *Carcinogenesis* **25**, 1747-1755 (2004).
- 897 28. Come, C. *et al.* CIP2A is associated with human breast cancer aggressivity. *Clin*  
898 *Cancer Res* **15**, 5092-5100 (2009).

- 899 29. Venkitaraman, A.R. Cancer susceptibility and the functions of BRCA1 and BRCA2.  
900 *Cell* **108**, 171-182 (2002).
- 901 30. Connolly, D.C. *et al.* Female mice chimeric for expression of the simian virus 40 TAG  
902 under control of the MISIR promoter develop epithelial ovarian cancer. *Cancer Res*  
903 **63**, 1389-1397 (2003).
- 904 31. Blomen, V.A. *et al.* Gene essentiality and synthetic lethality in haploid human cells.  
905 *Science* **350**, 1092-1096 (2015).
- 906 32. Janghorban, M. *et al.* Targeting c-MYC by antagonizing PP2A inhibitors in breast  
907 cancer. *Proc Natl Acad Sci U S A* **111**, 9157-9162 (2014).
- 908 33. Tian, Y. *et al.* CIP2A facilitates the G1/S cell cycle transition via B-Myb in human  
909 papillomavirus 16 oncoprotein E6-expressing cells. *Journal of cellular and molecular*  
910 *medicine* **22**, 4150-4160 (2018).
- 911 34. Hustedt, N. *et al.* A consensus set of genetic vulnerabilities to ATR inhibition. *Open*  
912 *Biol* **9**, 190156 (2019).
- 913 35. Kauko, O. *et al.* Phosphoproteome and drug-response effects mediated by the three  
914 protein phosphatase 2A inhibitor proteins CIP2A, SET, and PME-1. *J Biol Chem* **295**,  
915 4194-4211 (2020).
- 916 36. Duursma, A.M., Driscoll, R., Elias, J.E. & Cimprich, K.A. A role for the MRN complex  
917 in ATR activation via TOPBP1 recruitment. *Mol Cell* **50**, 116-122 (2013).
- 918 37. Ghandi, M. *et al.* Next-generation characterization of the Cancer Cell Line  
919 Encyclopedia. *Nature* **569**, 503-508 (2019).
- 920 38. Myant, K. *et al.* Serine 62 phosphorylated MYC associates with nuclear lamins and  
921 its regulation by CIP2A is essential for proliferation induction in vivo. *Molecular*  
922 *Cancer Research* **13** (2015).

- 923 39. Ceccaldi, R. *et al.* Homologous-recombination-deficient tumours are dependent on  
924 Poltheta-mediated repair. *Nature* **518**, 258-262 (2015).
- 925 40. Yanagida, M. Fission yeast cut mutations revisited: control of anaphase. *Trends in*  
926 *cell biology* **8**, 144-149 (1998).
- 927 41. Yamane, K., Chen, J. & Kinsella, T.J. Both DNA topoisomerase II-binding protein 1  
928 and BRCA1 regulate the G2-M cell cycle checkpoint. *Cancer Res* **63**, 3049-3053  
929 (2003).
- 930 42. Khanna, A. *et al.* Chk1 Targeting Reactivates PP2A Tumor Suppressor Activity in  
931 Cancer Cells. *Cancer Research* **73**, 6757-6769 (2013).
- 932 43. Liu, X. *et al.* Somatic loss of BRCA1 and p53 in mice induces mammary tumors with  
933 features of human BRCA1-mutated basal-like breast cancer. *Proc Natl Acad Sci U S*  
934 *A* **104**, 12111-12116 (2007).
- 935 44. Derksen, P.W. *et al.* Somatic inactivation of E-cadherin and p53 in mice leads to  
936 metastatic lobular mammary carcinoma through induction of anoikis resistance and  
937 angiogenesis. *Cancer Cell* **10**, 437-449 (2006).
- 938 45. Wellenstein, M.D. *et al.* Loss of p53 triggers WNT-dependent systemic inflammation  
939 to drive breast cancer metastasis. *Nature* **572**, 538-542 (2019).
- 940 46. Wang, J. *et al.* Oncoprotein CIP2A is stabilized via interaction with tumor suppressor  
941 PP2A/B56. *EMBO reports* **18**, 437-450 (2017).
- 942 47. Farrington, C.C. *et al.* Protein phosphatase 2A activation as a therapeutic strategy  
943 for managing MYC-driven cancers. *J Biol Chem* **295**, 757-770 (2020).
- 944 48. Metzger, E. *et al.* KDM4 Inhibition Targets Breast Cancer Stem-like Cells. *Cancer*  
945 *Res* **77**, 5900-5912 (2017).
- 946 49. Merisaari, J. *et al.* Monotherapy efficacy of BBB-permeable small molecule  
947 reactivators of PP2A in glioblastoma. *Brain Communications* **2**, fcaa002 (2020).

- 948 50. Kauko, O. *et al.* PP2A inhibition is a druggable MEK inhibitor resistance mechanism  
949 in KRAS-mutant lung cancer cells. *Science translational medicine* **10** (2018).
- 950 51. Khanna, A. *et al.* Constitutive CHK1 Expression Drives a pSTAT3-CIP2A Circuit that  
951 Promotes Glioblastoma Cell Survival and Growth. *Mol Cancer Res* (2020).
- 952 52. Rangarajan, A., Hong, S.J., Gifford, A. & Weinberg, R.A. Species- and cell type-  
953 specific requirements for cellular transformation. *Cancer Cell* **6**, 171-183 (2004).
- 954 53. Junttila, M.R. *et al.* CIP2A inhibits PP2A in human malignancies. *Cell* **130**, 51-62  
955 (2007).
- 956 54. Khanna, A. *et al.* MYC-dependent regulation and prognostic role of CIP2A in gastric  
957 cancer. *J Natl Cancer Inst* **101**, 793-805 (2009).
- 958 55. Beca, F. & Polyak, K. Intratumor Heterogeneity in Breast Cancer. *Adv Exp Med Biol*  
959 **882**, 169-189 (2016).
- 960 56. Peuhu, E., Virtakoivu, R., Mai, A., Warri, A. & Ivaska, J. Epithelial vimentin plays a  
961 functional role in mammary gland development. *Development* **144**, 4103-4113  
962 (2017).
- 963 57. Shalem, O. *et al.* Genome-scale CRISPR-Cas9 knockout screening in human cells.  
964 *Science* **343**, 84-87 (2014).
- 965 58. Sanjana, N.E., Shalem, O. & Zhang, F. Improved vectors and genome-wide libraries  
966 for CRISPR screening. *Nat Methods* **11**, 783-784 (2014).
- 967 59. Broderick, R., Nieminuszczy, J., Blackford, A.N., Winczura, A. & Niedzwiedz, W.  
968 TOPBP1 recruits TOP2A to ultra-fine anaphase bridges to aid in their resolution. *Nat*  
969 *Commun* **6**, 6572 (2015).
- 970 60. Leimbacher, P.A. *et al.* MDC1 Interacts with TOPBP1 to Maintain Chromosomal  
971 Stability during Mitosis. *Mol Cell* **74**, 571-583 e578 (2019).

- 972 61. Carpenter, A.E. *et al.* CellProfiler: image analysis software for identifying and  
973 quantifying cell phenotypes. *Genome Biol* **7**, R100 (2006).
- 974 62. Guzman, C., Bagga, M., Kaur, A., Westermarck, J. & Abankwa, D. ColonyArea: an  
975 ImageJ plugin to automatically quantify colony formation in clonogenic assays. *PLoS*  
976 *One* **9**, e92444 (2014).
- 977
- 978
- 979
- 980
- 981
